1 **A role for the VPS retromer in *Brucella* intracellular replication revealed**  
2 **by genome-wide siRNA screening**

3 Alain Casanova<sup>a,b</sup>, Shyan Huey Low<sup>a,c</sup>, Maxime Québatte<sup>a</sup>, Jaroslaw Sedzicki<sup>a</sup>, Therese  
4 Tschon<sup>a</sup>, Maren Ketterer<sup>a</sup>, Kevin Smith<sup>a,d</sup>, Mario Emmenlauer<sup>a,e</sup>, Houchaima Ben-Tekaya<sup>a,f</sup>,  
5 and Christoph Dehio<sup>a,#</sup>

6  
7 <sup>a</sup>Biozentrum, University of Basel, Switzerland

8  
9 Running Head: The VPS-Retromer is required for *Brucella* trafficking

10  
11  
12 #Address correspondence to Christoph Dehio, [christoph.dehio@unibas.ch](mailto:christoph.dehio@unibas.ch)

13 <sup>b</sup>Present address: Novartis Pharma Schweiz AG, Rotkreuz, Switzerland

14 <sup>c</sup>Present address: Lee Kong Chian School of Medicine, Nanyang Technological University

15 <sup>d</sup>Present address: Science for Life Laboratory, KTH Royal Institute of Technology, School of  
16 Computer Science and Communication, Solna, Sweden

17 <sup>e</sup>Present address: BioDataAnalysis GmbH, Munich, Germany

18 <sup>f</sup>Present address: University Hospital Basel, Basel, Switzerland

19  
20 AC, SL, and MQ. contributed equally to this work

21  
22 Word count for the abstract: 238

23 Word count for the text: 7563

24  
25 Key words: *Brucella*, siRNA, VPS retromer, VPS35, VPS26, RAB7A, replicative niche

26 **Abstract**

27 *Brucella*, the causing agent of brucellosis, is a major zoonotic pathogen with worldwide  
28 distribution. *Brucella* resides and replicates inside infected host cells in membrane-bound  
29 compartments called BCVs (*Brucella*-containing vacuoles). Following uptake, *Brucella*  
30 resides in eBCVs (endosomal BCVs) that gradually mature from early to late endosomal  
31 features. Through a poorly understood process that is key to the intracellular lifestyle of  
32 *Brucella*, the eBCV escapes fusion with lysosomes by transitioning to the rBCV (replicative  
33 BCV), a replicative niche directly connected to the endoplasmic reticulum (ER). Despite the  
34 notion that this complex intracellular lifestyle must depend on a multitude of host factors, a  
35 holistic view on which of these components control *Brucella* cell entry, trafficking and  
36 replication is still missing. Here we used a systematic cell-based siRNA knockdown screen in  
37 HeLa cells infected with *Brucella abortus* and identified 425 components of the human  
38 infectome for *Brucella* infection. These include multiple components of pathways involved in  
39 central processes such as cell cycle, actin cytoskeleton dynamics or vesicular trafficking. Using  
40 assays for pathogen entry, knockdown complementation and co-localization at single-cell  
41 resolution, we identified the requirement of the VPS retromer for *Brucella* to escape the  
42 lysosomal degradative pathway and to establish its intracellular replicative niche. We thus  
43 validated a component of the VPS retromer as novel host factor critical for *Brucella*  
44 intracellular trafficking. Further, our genome-wide data shed light on the interplay between  
45 central host processes and the biogenesis of the *Brucella* replicative niche.

46

47 **Importance**

48 With >300,000 new cases of human brucellosis annually, *Brucella* is regarded as one of the  
49 most important zoonotic bacterial pathogen worldwide. The causing agent of brucellosis  
50 resides inside host cells within vacuoles termed *Brucella* containing vacuoles (BCVs).  
51 Although few host components required to escape the degradative lysosomal pathway and to  
52 establish the ER-derived replicative BCV (rBCV) have already been identified, the global  
53 understanding of this highly coordinated process is still partial and many factors remain  
54 unknown. To gain a deeper insight into these fundamental questions we performed a genome-  
55 wide RNA interference (RNAi) screen aiming at discovering novel host factors involved in the  
56 *Brucella* intracellular cycle. We identified 425 host proteins that contribute to *Brucella* cellular  
57 entry, intracellular trafficking, and replication. Together, this study sheds light on previously  
58 unknown host pathways required for the *Brucella* infection cycle and highlights the VPS  
59 retromer components as critical factors for the establishment of the *Brucella* intracellular  
60 replicative niche.

61

## 62 **Introduction**

63 Cellular invasion is a common strategy shared by many bacterial pathogens of human and  
64 animals in order to escape host defenses and to establish a protected replicative niche. This  
65 notably applies to the human pathogens of the genus *Salmonella*, *Shigella*, *Legionella*, or  
66 *Brucella* (1-3). Knowledge of the host cellular pathways that are subverted by these pathogenic  
67 bacteria in order to reach and/or establish their intracellular replicative niches can be highly  
68 instructive for the development of new treatment strategies. *Brucella* is a facultative  
69 intracellular zoonotic pathogen causing animal and human brucellosis. With more than 300,000  
70 new cases of human brucellosis every year, *Brucella* is regarded as one of the most important  
71 zoonotic bacterial pathogen worldwide (4-6). There is currently no effective vaccination for  
72 humans and even prolonged combinatory antibiotic treatments do not fully protect against  
73 relapses (7). Therefore, *Brucella* remains a significant threat to public health and to the  
74 economy in endemic areas, and thus new treatment strategies to circumvent *Brucella* infections  
75 are highly needed.

76 At the cellular level, *Brucella* invades both phagocytic and non-phagocytic cells where bacteria  
77 persist and replicate inside membrane-bound compartments – the *Brucella* containing vacuoles  
78 (BCVs). BCVs sequentially interact with components of the host early and late endocytic  
79 pathway (eBCVs) then transit to establish the replicative niche (rBCVs) in vesicles that are  
80 directly connected to the endoplasmic reticulum (ER) (8) and harbor ER-specific markers, such  
81 as SEC61 and calnexin (8-10). Several critical steps for the intracellular journey of *Brucella*  
82 and their associated host factors have been resolved. For instance, adherence to the host cell  
83 surface is mediated via interaction with sialic acid residues or binding to fibronectin and  
84 vitronectin (11, 12). Internalization requires actin remodeling via the activity of the small  
85 GTPases RAC, RHO and direct activation of CDC42 (13). Upon internalization, bacteria are  
86 contained within eBCVs that successively associate with a subset of endosomal markers,

87 starting with RAB5, the early endosomal antigen (EEA1), the transferrin receptor (TfR), as  
88 well as the lipid rafts component flotillin-1 (9, 14-16). Next, the eBCVs associate with the late  
89 endosomal markers RAB7, RILP (RAB7's effector RAB interacting lysosomal protein),  
90 LAMP-1 (Lysosomal-associated membrane protein 1), and transiently with autophagosomal  
91 markers (9, 10). As they evolve late endosomal characteristics, acidification of the eBCVs  
92 serves as a trigger for the expression of the VirB type IV secretion system (T4SS, (17, 18)).  
93 This major pathogenicity factor is required to prevent the complete fusion of eBCVs with  
94 lysosomes, consequently allowing a fraction of the internalized *Brucella* to avoid host-  
95 mediated degradation, and promotes the maturation of the eBCVs towards the rBCVs (16, 18).  
96 Noteworthy, the T4SS effectors responsible for this escape remain largely elusive, despite a  
97 growing repertoire of identified candidates (recently reviewed in (19)). Most recently, it was  
98 discovered that subversion of both anterograde and retrograde transport and recruitment of  
99 Conserved Oligomeric Golgi (COG) tethering complex-dependent vesicles to the BCV  
100 promotes the establishment of the *Brucella* replicative niche (20). Importantly, despite all these  
101 findings, the precise mechanism(s) resulting in diversion of eBCVs from the endolysosomal  
102 pathway towards the ER-associated replicative compartment (rBCVs) is still largely  
103 unresolved. The same holds true for host factors required for maintenance of the replicative  
104 niche.

105 In this study, we took a systems-level approach to gain a deeper insight into these fundamental  
106 questions. Using a genome-wide RNA interference (RNAi) screening approach, we identified  
107 425 host proteins whose knockdown either increases (202) or decreases (223) *Brucella*  
108 intracellular replication. Beside the rediscovery of several previously identified host targets,  
109 that validates our approach, data reveals numerous novel candidate components that can  
110 modulate *Brucella* cellular entry, trafficking, and/or replication. Among these targets, we  
111 identified VPS35 and VPS26A, two components of the trimeric vacuolar protein sorting (VPS)

112 complex (termed here VPS retromer), which are required for the diversion of BCVs from the  
113 endolysosomal pathway and the establishment of the intracellular replicative niche.

114

## 115 **Results**

### 116 **A genome-wide siRNA screen reveals novel host pathways involved in *Brucella* infection**

117 To identify novel host factors important for *Brucella* intracellular infection, we performed a  
118 genome-wide siRNA perturbation screen on the human epithelial cell line HeLa (ATCC®  
119 CCL-2) combined with bacterial infection at biosafety-level 3. Infections of the siRNA-treated  
120 cells were performed with a GFP expressing strain of *B. abortus* and the outcome was analyzed  
121 at 48 h post-infection (hpi) using automated fluorescence microscopy (21, 22). Infection  
122 scoring was determined with a tailored high-content analysis workflow (Fig. 1 and Materials  
123 and Methods). In brief, a model of *Brucella* replication was fitted to the pathogen intensity  
124 distribution to gain an infection classification independent of absolute fluorescence intensity.  
125 Further, we implemented an image intensity normalization coupled with a novel pathogen-to-  
126 cell association approach, which enabled quantitative measurement of the pathogen intensity  
127 distribution (Materials and Methods). An overview of the results is presented in Fig. S1. To  
128 account for the well-known confounding off-target effects associated with siRNA technology  
129 (recently reviewed in (23)), we applied a multiple orthologous RNAi reagents approach  
130 (MORR (24)) with  $n \geq 5$  perturbations per host gene. Further, we applied the Redundant siRNA  
131 Analysis (RSA) algorithm (25) on the entire screening data to reduce the number of false  
132 positives caused by off-target effects of single siRNAs and to favors genes with a reproducible  
133 phenotype confirmed by independent siRNAs. Genes matching a Benjamini-corrected RSA p-  
134 value  $\leq 0.01$  with more than 3 hit wells were considered as significant and selected for further  
135 analysis (see also Material and Methods). As a result, we identified 425 significant hits  
136 affecting *Brucella* infection. These comprised 223 down-hits (Fig. S1A, red and Table S1) and

137 202 up-hits (Fig. S1A, green and Table S2). Single siRNA data points are presented in Fig. S2  
138 (down-hits) and Fig. S3 (up-hits). A panel of representative images from the screen is presented  
139 in Fig. 2A. Hit genes were further stratified by gene-annotation enrichment analysis and  
140 functional annotation clustering using DAVID (26), protein-protein interaction network using  
141 the STRING database (27), as well as manual datamining. The functional categories enriched  
142 in our hit lists are presented in Fig. 2B-D together with the high confidence protein-protein  
143 interaction network for targets that reduced (Fig. 2E) or increased (Fig. 2F) *Brucella* infection  
144 upon knockdown. Gene ontology and functional clustering analysis indicated a rather small  
145 overlap in enriched pathways when considering up or down hits (Fig. 2B-D). The most  
146 prominent clusters that positively affected infection upon knockdown comprised components  
147 involved in the control or the modulation of central cellular processes such as protein synthesis,  
148 transcription and mRNA processing, and cell cycle progression, as well as clathrin-mediated  
149 endocytosis (Fig. 2 and Table S2). The most prominent clusters that negatively affected  
150 infection upon knockdown comprised signaling pathways involved in actin-remodeling and  
151 phagocytosis. These included most core components of the Actin-related protein-2/3 complex  
152 (ARP2/3: ARPC2, ARPC3, ACTR2 and ACTR3), and one of its main modulator, the WASP  
153 regulatory complex (WRC: CYFIP1, WASF3, NCKAP1, and ABI3). Down-hits also  
154 comprised multiple components involved in TGF- $\beta$  and Eph signaling as well as further  
155 vesicular/endocytic pathways (Fig. 2 and Table S1). Among all these factors we can highlight  
156 the Ras related protein RAB7A, which is needed for *Brucella* trafficking to the replicative  
157 niche (10), the small GTPases RAC1 and CDC42, which are involved in *Brucella*  
158 internalization into non-phagocytic cells (13) as well as the transmembrane glycoprotein  
159 SLC3A2 (CD98hc), involved in both bacterial uptake and intracellular multiplication (28).  
160 Since the role of these individual components has already been described in the context of

161 *Brucella* infection, they can be considered as benchmark to our results, and globally validate  
162 our systems-level perspective of the human infectome for *Brucella* infection.

163

164 **Pathogen entry assay identifies a role for VPS35, VPS26A and SEC61 $\gamma$  in *Brucella* post-**  
165 **entry trafficking**

166 To further dissect the role of the identified genes in the progression of *Brucella* infection, we  
167 took advantage of a pathogen entry assay previously developed in our laboratory (29). Briefly,  
168 at 4 hpi host cell membrane-impermeable gentamicin was added to selectively kill extracellular  
169 *Brucella* and concomitantly cell membrane-permeable anhydrotetracyclin was added to induce  
170 expression of a plasmid-encoded reporter in the viable intracellular bacteria. At 8 hpi this  
171 approach allowed us to robustly identify individual intracellular bacteria and to quantify the  
172 bacterial load before intracellular replication is initiated (Fig. 3A and Material and Methods).  
173 For this assay, we selected a number of genes from the different pathways identified in the  
174 genome-wide screen as well as additional genes supplementing them (Table S3). The results  
175 of this entry assay were plotted against a matching endpoint assay (intracellular replication at  
176 48 hpi). Strikingly, most of the tested genes displayed a direct correlation between the results  
177 of the entry and the endpoint assay ( $r^2=0.763$ ). This was the case for components involved in  
178 the actin-remodeling pathway (RAC1, ACTR3, CYFIP1) or those involved in the TGF $\beta$   
179 signaling (SMAD4, TGFBR1, TGFBR2), which strongly reduced both entry and subsequent  
180 intracellular replication (Fig. 3B and Table S3). Similarly, the components of the clathrin  
181 pathway GAK and AP2S1 both increased bacterial entry and replication (Fig. 3B and  
182 Tables S3-4). This support their involvement in *Brucella* entry into non-phagocytic cells,  
183 without excluding an additional role at any further stage of the infection. To identify  
184 components with a divergent outcome between entry and replication, we selected genes  
185 diverging by more than one standard deviation to the fitted data. Six genes matched this



186 criterion (Fig. 3B). Three genes displayed an apparent higher effect on pathogen entry than  
187 subsequent replication (albeit at a rather modest level). These were the small GTPases CDC42  
188 (13), the  $\alpha 1$  subunit of the Na<sup>+</sup>,K<sup>+</sup>-ATPase ATP1A1(30) and the subtilisin-like  
189 endoproteinases FURIN (31). Most strikingly, three genes displayed a stronger reduction in  
190 endpoint replication compared to entry. Knockdown of Sec61 $\gamma$  - a central element of the ER-  
191 protein translocation machinery (see for instance (34), which has been previously involved  
192 in *Brucella* infection (35), showed a strong decrease in intracellular replication albeit no effect  
193 on pathogen entry. Similarly, our assay identified the vacuolar protein sorting associated  
194 proteins VPS35 and VPS26A - two essential components of the VPS retromer complex  
195 (recently reviewed in (32, 33)). These genes and associated pathway(s) thus likely represent  
196 novel components controlling the post-entry trafficking of *Brucella* towards its replicative  
197 niche and/or are themselves required for the establishment or maintenance of the rBCVs.  
198 For the present study, we further focused on the role of VPS35 and the VPS retromer in  
199 *Brucella* trafficking as it was the most prominent hit in our entry assay.

200

### 201 **The VPS retromer is important for *Brucella* intracellular replication**

202 The retromer complex orchestrates the recycling of numerous transmembrane proteins from  
203 early and maturing endosomes either to the trans-Golgi network (TGN) or back to the plasma  
204 membrane. Formed by a heterotrimeric complex consisting of VPS26, VPS29, and VPS35, the  
205 VPS retromer is conserved from yeast to human. However, the individual retromer sub-  
206 complexes have functionally diverged to organize multiple distinct sorting pathways,  
207 depending on the association with different accessory factors (32, 33). To further decipher the  
208 role of the retromer in *Brucella* trafficking and intracellular replication we specifically browsed  
209 our genome-wide siRNA data for retromer-associated proteins (Fig. 4A and D). Further to  
210 VPS35 and VPS26A, already identified both in the genome wide and in the entry screen

211 (Fig. 2E and Fig. 3B), knockdown of VPS26B (the paralogue of VPS26A) resulted in a  
212 significant reduction in *Brucella* infection (Fig. 4D). Depletion of VPS29, the third core  
213 component of the VPS retromer, resulted only in a mild reduction of *Brucella* infection and did  
214 not reach significance due to the wide spread of data obtained for the cohort of 9 individual  
215 siRNAs tested (suggestive of strong off-target effects). Next to the retromer component,  
216 knockdown of the small GTPase RAB7A showed the strongest reduction in intracellular  
217 *Brucella* (Fig 4D). However, neither SNX3, that together with the VPS retromer forms the  
218 SNX3 retromer nor SNX27, another retromer-associated component involved in endosome-to-  
219 plasma membrane trafficking (36, 37), displayed significant effect (Fig. 4D). Depletion of  
220 SNX1 and SNX5, two of the four sorting nexins of the SNX-BAR retromer (38), even seems  
221 to enhance *Brucella* infection (although they did not pass our hit-selection criterion) while the  
222 two others, SNX2 and SNX6, showed no effect (Fig. 4D). Noteworthy, the functional  
223 association of the SNX-BAR sorting nexins with the VPS retromer has been challenged by two  
224 recent publications, which rather support a VPS-independent action of SNX-BAR (39, 40).  
225 Collectively, our data indicate that the observed post-entry impairment in *Brucella* intracellular  
226 replication is specifically linked to the integrity of the heterotrimeric VPS retromer, although  
227 involvement of further components in this process cannot be excluded.

228 To validate the requirement of VPS35 on *Brucella* infection and to rule out any off-target  
229 effects, we performed a complementation experiment using a VPS35 cDNA insensitive to a  
230 co-expressed shRNA (41). While shRNA knockdown of endogenous VPS35 inhibited *Brucella*  
231 infection, as detected in our genome-wide approach, ectopic expression of the shRNA-  
232 insensitive cDNA of VPS35 rescued the phenotype (Fig. 4B and C), confirming that depletion  
233 of VPS35 indeed negatively affects *Brucella* infection. We further confirmed the observed  
234 requirement of the VPS retromer for *Brucella* intracellular replication by determining  
235 intracellular bacterial load at different infection time of siRNA-transfected cells using colony

236 forming unit (CFU) determination (Material and Methods). At 6 hpi, no significant difference  
237 to the control was detected, with the exception of a small increase in intracellular bacteria upon  
238 VPS35 knockdown (Fig. 4E). Importantly, at 20 h and 44 hpi, siRNA knockdown of either  
239 VPS35, VPS29, or VPS26 resulted in a significant decrease of viable intracellular *Brucella*  
240 compared to control-treated cells (Fig. 4E) confirming the data obtained by our microscopy-  
241 based entry screen (Fig. 3). Further, efficiency of siRNA knockdown was confirmed by  
242 Western blot analysis (Fig. 4F and Table S4). Together, these results corroborate the  
243 importance of each constituent of the VPS retromer, including VPS29, for *Brucella* to reach  
244 and possibly to maintain its intracellular replicative niche.

245

#### 246 **VPS35 knockdown prevents *Brucella* escape from the lysosomal pathway**

247 Transient association with the lysosomal marker LAMP-1 is a hallmark of BCV trafficking  
248 during the first hours of infection. This association is eventually lost for those bacteria that  
249 manage to escape the host degradative pathway. Thus, to investigate the role of VPS35 in  
250 *Brucella* trafficking and to assess at which stage it could be required for the establishment of  
251 the intracellular replicative niche, we quantified *Brucella* co-localization with LAMP-1 in  
252 siRNA-treated and control cells. To this end, we analyzed *Brucella*-infected HeLa cells at 6  
253 and 18 hpi and determined the percentage of LAMP-1 co-localization for each detected  
254 bacteria, combining immunostaining and confocal microscopy (Fig. 5 and Materials and  
255 Methods). At 6 hpi, most *Brucella* were found within LAMP-1-positive vesicles in both control  
256 and siRNA-treated cells (Fig. 5A-D, F), indicating that VPS35 function is not required for the  
257 early trafficking of the BCVs. However, loss of LAMP-1 association at 18 hpi was mainly  
258 detected in control cells whereas most *Brucella* remained in a LAMP-1 positive compartment  
259 upon VPS35 knockdown (Fig 5B, C). Accordingly, VPS35 depletion strongly reduced  
260 intracellular replication of *Brucella* 18 hpi (Fig. 5G) compared to control cells (Fig. 5E).

261 Altogether, our single cell co-localization analysis demonstrates the requirement of VPS35,  
262 and thus of a functional VPS retromer, for the diversion of BCVs from the lysosomal pathway  
263 and for the subsequent establishment of a successful replicative niche.

264

## 265 **Discussion**

266 The different membrane-bound organelles that compose the secretory pathway and the endo-  
267 lysosomal system of eukaryotic cells constitute targets of choice for many intracellular  
268 pathogens, which have evolved highly diverse strategies to hijack and/or subvert these  
269 trafficking pathways to their benefit (2, 3). In that context, the importance of retrograde  
270 trafficking for the infection cycle of a number of human pathogens (viruses and bacteria) has  
271 been recognized in the past years (e.g., (42, 43)). This is for instance the case for *Chlamydia*  
272 *trachomatis*, which uses its effector LncE to subvert host restriction via direct interaction with  
273 SNX5, thereby disrupting retromer trafficking (44, 45). Further pathogens have been shown to  
274 specifically target the VPS retromer, using or subverting its function to their advantage. For  
275 instance, the Hepatitis C virus interacts with VPS35 through its protein NS5A. This viral  
276 protein is recognized as VPS retromer cargo and its interaction with VPS35 supports viral  
277 replication (46). Among bacterial pathogens, the best-studied example to date is the subversion  
278 of the VPS retromer function by the T4SS effector RidL of *Legionella pneumophila*. RidL was  
279 shown to interact with VPS29, inhibiting retromer activity by outcompeting the binding of the  
280 VPS retromer regulator TBC1d5 and thereby promoting *Legionella* intracellular replication  
281 (47-49). Most recently, integrity of the *Salmonella* containing vacuole was shown to be  
282 maintained by the direct interaction of the SPI-2 T3SS effector SseC with the VPS retromer  
283 (50). In this study, we report the involvement of the VPS retromer in *Brucella* intracellular  
284 cycle. More specifically, we show that the VPS retromer integrity is required for *Brucella* to  
285 escape the host degradative pathway, as supported by the inability of the eBCVs to mature

286 upon VPS35 knockdown towards LAMP-1 negative rBCVs. We further show that this VPS-  
287 retromer-dependent process takes place after internalization and early trafficking, between 6 h  
288 and 18 hpi, matching the estimated timing of the eBCV-to-rBCV transition. It is thus tempting  
289 to speculate that the VPS retromer, possibly together with RAB7A, plays a role in this yet  
290 elusive but essential branching point of *Brucella* intracellular trafficking i.e. diversion from the  
291 lysosomal pathway towards its ER-associated replicative niche. An alternative, yet non-  
292 exclusive hypothesis is that the VPS retromer is involved in the establishment of the rBCV,  
293 possibly by providing host factors and/or membranes that follow retrograde trafficking. A  
294 further role for the VPS retromer in the maintenance of the rBCV cannot be excluded based on  
295 our results. With the accumulation of functional data and the increasing number of described  
296 interactors, the VPS retromer is nowadays largely appreciated as recruiting hub that  
297 orchestrates the retrograde endosomal trafficking of numerous cargos to the TGN or the plasma  
298 membrane (32, 33, 51). This versatility however obscures the identification of the underlying  
299 mechanism(s) by which VPS35 and the VPS retromer may contribute to *Brucella* intracellular  
300 fate. Further browsing our dataset for the effect of known VPS retromer interactors failed  
301 resolving the VPS retromer-dependent pathway(s) – if any – that is required for *Brucella*  
302 intracellular replication. The only VPS retromer interactor that we unambiguously identified is  
303 the small GTPase RAB7A, which is essential for the recruitment of the retromer to endosomal  
304 membranes (52, 53). Importantly, association of this upstream interactor to the eBCV is a well-  
305 established hallmark of early *Brucella* intracellular trafficking (9, 10, 16). Moreover, over-  
306 expression of a RAB7 dominant negative allele (RAB7<sup>T22N</sup>) impairs the establishment of the  
307 *Brucella* replicative niche (10). This finding was recapitulated by our siRNA knockdown  
308 approach, strengthening the role of RAB7 in controlling BCVs' fate, albeit by an unknown  
309 mechanism. Considering that the recruitment of the retromer to endosomal membranes is  
310 strictly dependent on the presence of RAB7, it is conceivable to assume that depletion of RAB7

311 prevents the recruitment of VPS35 to the BCV, consequently explaining the RAB7-  
312 dependency observed for *Brucella* replication. Alternatively, very recent findings have  
313 established that retromer depletion in Hela cells actually results in the hyper-activation of  
314 RAB7, which causes an overall depletion of the RAB7 pool on endo-membranes (54). That  
315 drastic consequence could also imply an indirect effect of the observed retromer requirement  
316 for *Brucella* trafficking, by acting at the level of RAB7 activity and its availability for the BCV  
317 maturation. However, our results indicate that the effect of RAB7A or VPS35 siRNA  
318 knockdown are not entirely congruent. Whereas depletion of either factor impairs *Brucella*  
319 intracellular replication, only RAB7A knockdown showed a marked effect on pathogen entry  
320 whereas VPS35 appears to be only required at a later stage of the infection. The implications  
321 of the newly described feedback signaling on RAB7 triggered by the retromer depletion, as  
322 well as the relative contribution of the VPS retromer and RAB7 for the transition of the eBCVs  
323 to rBCVs should be addressed in future studies.

324 Besides the retromer complex, our study pinpointed the involvement of several host pathways  
325 in *Brucella* infection, which had not yet been associated with this process. The most prominent  
326 cluster negatively affecting infection upon knockdown comprises factors involved in actin  
327 remodeling and actin dynamics as well as associated signaling pathways. Apart from an early  
328 association of Arp2/3 with BCVs (55), surprisingly little is known about the exact role played  
329 by the Arp2/3 complex or the WASP regulatory complex and their regulators during and  
330 possibly after *Brucella* internalization. Here as well, further studies will be needed to decipher  
331 the precise nature of their involvement. Finally, we also found that members of the TGF- $\beta$  and  
332 FGF signaling pathways promote *Brucella* infection as their depletion resulted in decreased  
333 *Brucella* infection. Interestingly, it has previously been reported that patients with brucellosis  
334 show higher TGF- $\beta$ 1 serum levels, a finding that is correlated with depressed T cell function  
335 (56). Further, B cells were also shown to produce TGF- $\beta$  at early stages of infection with

336 *Brucella* in mice (57). A possible immunosuppressive role for this pathway during *Brucella*  
337 infection should be further investigated.

338 Summing-up, we believe that the genes and pathways identified in this study constitute a rich  
339 resource towards the understanding of *Brucella* intracellular trafficking, which ultimately  
340 should allow development of new approaches to controlling *Brucella* infections in human.

341

## 342 **Material & Methods**

### 343 **Cell lines and plasmid constructs**

344 All experiments were performed in the human cervical carcinoma epithelial cell line (Hela)  
345 ATCC® CCL-2. Infections were performed using *Brucella abortus* 2308 carrying the  
346 constitutive GFP expression plasmid pJC43 (*aphT::GFP* (58)), pAC042.08 for entry assay  
347 (*aphT::dsRed,tetO::tetR-GFP* (29)) or pAC037 (*aphT::cerulean*, this study) for rescue  
348 experiments. Cells and bacteria were grown as described in (22, 29). pAC037 was constructed  
349 by replacing dsRed from pJC44 (10) with Cerulean from pCERC-1 (59). Cerulean was  
350 amplified using prAC082 (TGGATCCGAAAGGAGGTTTATTAAATGGTGAGCAAGGG-  
351 CGAGGAGC) and prAC083 (TCTAGAGCTAGCTTACTTGTACAGCTCGTC) and cloned  
352 into pJC44 by restriction/ligation using BamHI and XbaI. The ribosomal binding site which  
353 was lost on pJC44 using the above restriction was re-introduced on prAC082.

### 354 **siRNA reverse transfection**

355 Reverse siRNA transfection was performed as described in (22, 29) with minor adjustments.  
356 In brief, Genome-wide screens were performed with Dharmacon ON-TARGETplus SMART  
357 pool (pool of 4 siRNA per gene) and Qiagen Human Whole Genome siRNA Set HP  
358 GenomeWide (QU, 4 individual siRNAs for each target). Further validation screens included  
359 Ambion Silencer and Ambion Silencer Select custom libraries (with up to 6 additional siRNAs  
360 for about 1000 genes) and Sigma MISSION esiRNA libraries for 1900 genes. All screening

361 experiments were conducted in a 384-well plate format. Each plate contained negative controls  
362 such as mock (transfection reagent only) and scrambled (non-targeting) siRNA. In addition,  
363 general siRNA controls for transfection efficiency and toxicity (e.g. Kif11, Fig. S1C) as well  
364 as positive controls (e.g. Cdc42, Rac1) that are known to have an effect on *Brucella* infection  
365 (13) were added to each plate. Based on Kif11, the average transfection efficiency reached  
366 97.6% (91.5 – 99.99). The following specifications apply to all siRNA screens except the QU  
367 siRNA library where specifications are given in brackets. RNAiMAX in DMEM without fetal  
368 calf serum (FCS) was added to each well containing 1.6 pmol siRNA (QU: 1 pmol) or 15 ng  
369 esiRNA. Screening plates were then incubated at room temperature (RT) for 1 h. Following  
370 incubation, 500 HeLa cells were seeded per well in DMEM (FCS 10% final). Plates were  
371 incubated at 37°C and 5% CO<sub>2</sub> for 72 h prior to infection. For assays in 96- and 24-well formats  
372 reverse transfections were performed in 6-well plates and subsequently reseeded in the  
373 respective plate format. On-target or control siRNAs were added to reach a final siRNA  
374 concentration of 20 nM together with RNAiMAX transfection reagent in DMEM without FCS.  
375 After 30 min of complex formation at room temperature, 110,000 HeLa cells in DMEM/10%  
376 FCS were added to each well. After 48 h transfection, cells were harvested by trypsinization  
377 and reseeded in DMEM/10%FCS (96-well plates: 2'800 cells per well; 24-well plates: 50,000  
378 cells per well). The next day cells were infected as described hereafter. The following siRNAs  
379 used for CFU determination, colocalization experiments, and/or immunoblotting validation  
380 were purchased from Qiagen (Hilden/Germany): VPS35 (SI00760690); VPS26A  
381 (SI00760543); VPS26B (SI00631267); VPS29 (SI00760613); all star negative (0001027281);  
382 all star death kif11 (0001027299).

### 383 **Infection**

384 For the genome-wide and confirmation screens, infections were performed in 384-well plates  
385 as described in (22, 29). In short, *B. abortus* 2308 pJC43 (*aphT::GFP* (58)) was grown in TSB



386 medium containing 50 µg/ml kanamycin at 37°C to an OD of 0.8 - 1.1. Bacteria were then  
387 diluted in DMEM/10% FCS and added at a final MOI of 10,000. Plates were centrifuged at  
388 400 x g for 20 min at 4°C to synchronize bacterial entry. After 4 h incubation at 37°C and 5%  
389 CO<sub>2</sub>, extracellular bacteria were killed by exchanging the infection medium by DMEM/10%  
390 FCS supplemented with 100 µg/ml gentamicin. After a total infection time of 44 h, cells were  
391 fixed with 3.7% PFA for 20 min at RT. For the entry assay, infections were performed as  
392 described in (29). In brief, transfected cells were infected with *B. abortus* 2308 pAC042.08 for  
393 4 h after which GFP expression was induced for 4 h by the addition of Anhydrotetracycline  
394 (100 ng/ml) during the gentamicin killing of extracellular bacteria. Follow-up experiments and  
395 colocalization assays were performed according to the above-described protocol in 96-well and  
396 24-well plates, respectively. For the colocalization assay cells were infected at a MOI of 2,000.  
397 2 hpi cells were washed three times with DMEM/10% FCS containing gentamicin (100 µg/ml).  
398 After the indicated incubation time cells were washed three times with PBS and finally fixed  
399 for 20 min in 3.7% PFA (in PBS).

#### 400 **Imaging with high-throughput microscopy**

401 Microscopy was performed with Molecular Devices ImageXpress microscopes. MetaXpress  
402 plate acquisition wizard with no gain, 12 bit dynamic range, 9 sites per well in a 3x3 grid was  
403 used with no spacing and no overlap and laser-based focusing. DAPI channel was used for  
404 imaging nucleus, GFP for bacteria, and RFP for F-actin or dsRed of bacteria in the entry assay.  
405 Robotic plate handling was used to load and unload plates (Thermo Scientific). The objective  
406 was a 10X S Fluor with 0.45NA. The Site Autofocus was set to “All Sites” and the initial well  
407 for finding the sample was set to “First well acquired”. Z-Offset for Focus was selected  
408 manually and manual correction of the exposure time was applied to ensure a wide dynamic  
409 range with low overexposure. Images from the different siRNA screens are available upon  
410 request.

## 411 **Image analysis**

412 Images were analyzed with the screeningBee analysis framework from BioDataAnalysis  
413 GmbH. To correct for uneven illumination inherent in wide-field microscopic imaging, an  
414 illumination correction model was computed for every plate using Cidre (60). To ensure that  
415 the Cidre-corrected image intensities fall within the range [0.0, 1.0] a linear transformation for  
416 pixel intensities was computed that maps the 0.001-quantile to 0.01 and the 0.999-quantile to  
417 0.99 post-illumination correction. Illumination correction and intensity scaling were performed  
418 as pre-processing steps for every image prior to analysis.

419 To reduce the signal of *Brucella* DNA in the DAPI channel, a linear transform of the GFP  
420 channel was subtracted from the DAPI channel, with the linear transformation parameters  $f$ ,  $o$   
421 estimated in the following way: a mapping of GFP pixels to DAPI pixels was constructed so  
422 that for all intensities in the GFP images, the list of corresponding intensities in the DAPI  
423 images were recorded. For every list of DAPI intensities, only the mean intensities were  
424 retained. This creates a mapping of GFP intensities to their corresponding mean DAPI  
425 intensities. A linear regression was performed to obtain the linear parameters  $f$ ,  $o$  that map the  
426 GFP channel image to the DAPI channel image. Cleaned DAPI images with a reduced *Brucella*  
427 signal were obtained by subtracting the linear transform of the GFP channel from the DAPI  
428 channel  $I'_{\text{DAPI}} = I_{\text{DAPI}} - (f I_{\text{GFP}} + o)$  as pre-processing steps for every image prior to analysis.

429 On a random subset of 128 images, CellProfiler (61) was executed to identify Nucleus objects  
430 using “OTSU Global” segmentation in the DAPI channel, and the median, lower quartile and  
431 upper quartile segmentation thresholds of the images were retained as  $T_{\text{DAPI-m}}$ ,  $T_{\text{DAPI-lq}}$  and  
432  $T_{\text{DAPI-uq}}$ . On the same images, the GFP background intensity  $B_{\text{GFP}}$  was obtained as the position  
433 of the peak in the GFP intensity histogram, the dynamic range of the histogram  $D_{\text{GFP}}$  was  
434 obtained as the difference between the 99% quantile and the 1% quantile of intensity values,  
435 and the Bacteria segmentation threshold was computed as  $T_{\text{GFP}} = B_{\text{GFP}} + \frac{2}{100} D_{\text{GFP}}$ . On all images,

436 screeningBee CellProfiler was executed to perform object segmentation and measurements  
437 with the following steps: (a) Nuclei were detected as primary objects using manual threshold  
438 setting. For each plate it was manually chosen to use  $T_{\text{DAPI-m}}$ ,  $T_{\text{DAPI-lq}}$  or  $T_{\text{DAPI-ug}}$ , depending on  
439 visual inspection of the segmentation results. Using the same threshold on all images improved  
440 site-to-site comparability. (b) Cells were detected as secondary objects around the Nuclei, with  
441 “OTSU Global” segmentation in the RFP channel. (c) Bacteria were detected as primary  
442 objects using manual threshold setting with threshold  $T_{\text{GFP}}$ . Using the fixed background  
443 intensity as a reference for  $T_{\text{GFP}}$  allowed for segmenting even rather dim objects while avoiding  
444 site-to-site variability. In order to accurately measure infection scoring, a reliable method to  
445 associate pathogen colonies to individual cells is necessary. A straightforward approach is to  
446 assume that pathogen colonies must be contained within the body of the host cell. However,  
447 high cell confluence can make actin channel-based cell body segmentation inaccurate. Single  
448 microcolonies are often split into pieces that are incorrectly assigned to neighboring cells using  
449 this approach (Fig. 1B). To address this issue, we developed a novel algorithm to intelligently  
450 assign pathogen colonies to robust nucleus objects (Fig. 1C). First, inexpensive ‘bridge’ and  
451 ‘majority’ morphological operations were applied to the pathogen objects to connect broken  
452 clumps. Next, a weighted distance metric was used to measure an attraction score  $a_{N,P}$  between  
453 a pathogen  $P$  and individual nuclei  $N$  within a close proximity  $d_{\text{prox}}$ . The attraction score is  
454 computed as the surface integral of the nucleus area in a continuous field emanating from the  
455 pathogen defined by an exponential function that is strongest within the microcolony itself, and  
456 decays exponentially as distance from the microcolony increases:  $a_{N,P} =$   
457  $\sum_{n \in N} e^{-\lambda d_{n,p}}$ , where  $n$  is an element (pixel) belonging to nucleus object  $N$ ,  $d_{n,p}$  is the  
458 distance transform from the edge of microcolony  $P$  to  $n$ , and  $\lambda$  is a parameter controlling the  
459 strength of the decay. Attraction scores for all nuclei proximate to microcolony  $P$  are  
460 normalized such that the strongest nucleus attraction score is 1,  $\underline{a}_{N,P} =$

461  $\frac{a_{N,P}}{\max(a_{N,P})} \forall N \quad s.t. d_{n,p} < d_{prox}$ . Nuclei objects with normalized attraction scores above a  
462 threshold  $a_{min}$  are associated with the pathogen microcolony. In the case that multiple nuclei  
463 are associated with the same microcolony, the microcolony is split so that each element is  
464 associated to the nearest nuclei. Large microcolonies are encouraged to split with greater ease  
465 than small microcolonies by weakening the minimum attraction score linearly according to  
466 area of the microcolony  $a'_{min} = 0.5 a_{min}$  if  $A_P < A_{large}$ , or  $a'_{min} = 1 - 0.5 \frac{A_P - A_{large}}{A_{large}} a_{min}$   
467 if  $A_{large} \leq A_P \leq 2A_{large}$ , and  $a'_{min} = 0.5 a_{min}$  otherwise (where  $A_P$  is the area of the  
468 pathogen microcolony). Parameters settings  $d_{prox} = 45$ ,  $\lambda = 0.2$ ,  $a_{min} = 0.5$ , and  
469  $A_{large} = 8,000$  were optimized by grid search on a dataset of 7,566 hand-labeled segmentations  
470 resulting in a 95.58% correct association rate.

471 Nucleus to pathogen microcolonies associations were aggregated. The area and integrated  
472 intensity of the pathogen objects associated to each cell and the mean intensity of the Nuclei in  
473 the GFP channel was computed as readout.

#### 474 **Infection scoring for endpoint assays**

475 Wells that contain only 32 Cells or less were excluded from infection scoring. In the remaining  
476 wells, Bacteria were filtered in a decision tree (DT) classification to exclude objects of only  
477 one-pixel area. Based on the relation of Bacteria to Nuclei, for the remaining Bacteria objects,  
478 the integrated GFP intensity was integrated over all Bacteria relating to a Cell. To reduce the  
479 impact of background intensity, an estimate for GFP background was computed using the 1%  
480 lower quantile of mean GFP intensity in the Nuclei. For every Cell, the estimated GFP  
481 background intensity was multiplied with the area of Bacteria relating to this cell, and the result  
482 was subtracted from the integrated Bacteria GFP intensity of the Cell, to arrive at a background-  
483 free estimate of “bacterial load” in each Cell. The value range for this intensity was zero for  
484 Cells with no segmented Bacteria objects, and higher than zero for all other Cells. This

485 integrated GFP intensity was then log<sub>2</sub>-scaled, to reflect the exponential growth of replicating  
486 *Brucella*. Before log<sub>2</sub>-scaling, a small epsilon value of 2<sup>-20</sup> was added to every Cell, so that the  
487 log<sub>2</sub> value of Cells with no segmented Bacteria will not be negative infinity. The arbitrary  
488 value 2<sup>-20</sup> is by a large margin smaller than the smallest actual intensity of our assays, but large  
489 enough to be used in histogram binning. For every plate, the histogram of the log<sub>2</sub>-scaled  
490 integrated cellular GFP intensity was computed (Fig. 1D) with a bin size of 0.025. The  
491 histograms were normalized to an arbitrary “virtual plate cell count” of 10<sup>10</sup>. To extrapolate a  
492 continuous distribution from the possibly sparse histogram, kernel density estimation (KDE)  
493 was used with a manually optimized Gaussian kernel of standard deviation 16. The histogram  
494 shows a bimodal distribution. By correlating the plate histogram distributions to selected  
495 images from the plate, we could identify that the first mode of the distribution is composed of  
496 cells with a low number of infection events ranging from single *Brucella* to small clusters  
497 (denoted as), whereas the second mode is composed of large colonies (denoted as). The two  
498 peak positions of the bimodal distribution were identified. Normal distributions G<sub>S</sub> and G<sub>L</sub> were  
499 fitted to the peak positions for small and large colonies, respectively. For the fitting of G<sub>S</sub> and  
500 G<sub>L</sub>, the mean was given by the position of the peak, the height was given by the height of the  
501 peak, and the variance was optimized such that the distance between the KDE and the sum of  
502 G<sub>S</sub> and G<sub>L</sub> became minimal. To arrive at a binary infection scoring threshold, we identified a  
503 suitable value three standard deviations below the mean of G<sub>L</sub>. This threshold includes 99.8%  
504 of the events in G<sub>L</sub>. Cells with an integrated GFP intensity exceeding this threshold were  
505 considered true positive infections and were labelled infected. The infection score was  
506 computed as the ratio of infected Cells to the total number of Cells in the well.

### 507 **Redundant siRNA Analysis (RSA) and hit selection**

508 Redundant siRNA Analysis RSA (25) ranks genes by iteratively assigning hypergeometric p-  
509 values to each of the multiple siRNAs targeting the same gene and picking the minimum value

510 within a given group to represent this gene. The ranking score indicates whether the distribution  
511 of ranks corresponding to a gene is shifted towards the top, thereby aggregating the information  
512 provided by independent siRNA sequences with the same target in a robust manner. Individual  
513 siRNAs from the Qiagen library and the averages of independent replicates of the Dharmacon,  
514 Ambion, and Sigma libraries (repeated experiments with identical siRNA) were used as input.  
515 Prior to RSA analysis, siRNA targets were re-identified by searching against ENSEMBL  
516 cDNA and the REFSEQ mRNA nucleotide data, in order to ensure comparability between  
517 libraries. Cases where matching failed were excluded from this analysis. Data was further  
518 filtered removing all wells that do not pass quality control, control wells and wells where cell  
519 count was below the initially seeded cell number (500). As both up- and down hits are of  
520 interest to this analysis, RSA was run twice, once with Z-scored infection scores ranked from  
521 low to high values and once ranked oppositely. The RSA parameters were set as follows: upper  
522 and lower bound (-0.5; -2) or (-0.5;-10) on averaged z-scored infection score for down and up-  
523 hits, respectively. Bonferroni correction was applied to account for the different number of  
524 siRNAs per gene. Genes matching a Benjamini-corrected RSA P-value  $\leq 0.01$  with more than  
525 3 hit wells were considered as significant and selected for further analysis.

### 526 **Infection scoring for entry assays**

527 Wells containing only 32 Cells or less were excluded from infection scoring. In the remaining  
528 wells, Bacteria were filtered in a decision tree (DT) classification to exclude objects of only  
529 one pixel area. The remaining Bacteria were filtered in a DT classification to exclude objects  
530 of less than a manually set threshold on the upper quartile of the object intensity. The remaining  
531 Bacteria were considered true positive infections. Based on the relation of Bacteria to Nuclei,  
532 Cells were labeled infected if and only if a true positive Bacteria is related to the Cells Nuclei.  
533 The infection score was computed as the ratio of infected Cells to the total number of Cells in  
534 the well. For quantification of bacterial load in infected cells, the median of integrated GFP

535 intensity of all true positive Bacteria was computed. The final infection readout was the product  
536 of the infection rate and bacterial load, which gives a robust approximation of the amount of  
537 intracellular bacteria (29).

### 538 **Rescue experiment**

539 The shRNA suppression/rescue constructs for VPS35 were kind gifts from Daniel Billadeau  
540 (41). HeLa cells were seeded in a 6-well plate and transfected 4 h later with 0.9 µg of plasmid  
541 DNA using Fugene HD according to the manufacturer's protocol. 72 h post-transfection cells  
542 were reseeded into a 96-well plate (2'800 cells / well) and infected on the following day. Cells  
543 were infected with *Brucella abortus* carrying pAC037 for 48 h. After PFA fixation and  
544 staining, cells were analyzed by image analysis. Infection scoring was performed on YFP  
545 positive cells, indicative of successful transfection.

### 546 **Determination of intracellular bacterial load by CFU determination**

547 Infections of siRNA-transfected Hela cells were performed in 96-well plates as described  
548 above. At 6, 20, or 44 hpi, infected cells were washed with 200 µl PBS and lysed for 10 min  
549 with 0.1 % Triton X-100 / PBS. Lysed cells (6 wells per conditions) were collected in 2 ml  
550 screw-cap tubes and washed once with 1 ml PBS. Pellet was Resuspended in 1 ml PBS and  
551 subjected to 5-fold serial dilution before plating onto TSA plate. CFU were counted after 3  
552 days growth at 37°C and normalized to the CFU obtained by the scrambled siRNA-treated cells  
553 from the matching biological replicate.

### 554 **Immunoblotting**

555 Proteins from total cell lysates (10 - 20 µg) were separated by SDS-PAGE, transferred onto  
556 PVDF membranes (Hybond 0.2 µm, Amersham GE Life Sciences) and probed using the  
557 indicated antibodies. The secondary HRP-conjugated antibody was visualized by  
558 chemiluminescence (SeraCare developer Solution). For anti-tubulin probing, membranes were  
559 first treated with stripping buffer (Thermo Scientific), washed and reprobed. Polyclonal rabbit

560 antibodies against VPS35 (ab97545, abcam), VPS29 (ab98929, abcam), rabbit monoclonal  
561 antibody against VPS26 (ab98929, abcam ) or mouse monoclonal antibody against  $\beta$ -tubulin  
562 (T8328, Sigma) were used according to manufacturer's instructions. Quantification of  
563 immunoblots was performed using ImageJ.

#### 564 **Immunofluorescence for LAMP-1 co-localization**

565 Following fixation with 3.7% PFA in PBS for 20 min, HeLa cells were incubated in PBS  
566 containing 250 mM glycine for 20 min to quench remaining aldehyde residues. Cells were then  
567 permeabilized with saponin buffer (PBS containing 0.2% saponin and 3% bovine serum  
568 albumin) for 1 h. Immunostaining was performed by incubating coverslips with saponin buffer  
569 containing antibodies against LAMP-1 (Abcam ab25630) and *Brucella abortus* LPS polyclonal  
570 rabbit serum (kind gift from Xavier De Bolle (62)) overnight in a humidified chamber at 4°C.  
571 The coverslips were then washed three times with PBS and incubated with saponin buffer  
572 containing respective fluorophore-conjugated secondary antibodies: goat anti-mouse Alexa  
573 Fluor 488 (Thermo Fisher A11029) and anti-rabbit Alexa Fluor 647 (Cell Signaling #4414) for  
574 3 h in a humidified chamber at room temperature. The coverslips were then washed three times  
575 with PBS and mounted onto glass slides using Vectashield H-100 Antifade Mounting Medium  
576 (Vector Laboratories) and sealed with nail polish.

#### 577 **Confocal microscopy for single cell data**

578 The images were captured with the LSM-800 Confocal Microscope (Carl Zeiss) using a 63x  
579 oil objective. For each condition, 40 images were obtained at random locations across the  
580 coverslip, representing more than 50 individual cells per conditions. The images were  
581 deconvolved using Huygens software (Scientific Volume Imaging). The presence of LAMP-1  
582 signal around the bacteria was quantified from the images by assessing the overlap between  
583 the anti-LPS and the anti-LAMP-1 staining for each individual bacterium (more than 400 per  
584 condition).



585

## 586 **Acknowledgments**

587 We want to thank Julia Feldmann and Dr. Sonia Borrell from the SwissTPH, Basel, Switzerland  
588 for great assistance and support with the BSL-3 environment. We are thankful to the Imaging  
589 Core Facility of the Biozentrum, Basel for excellent assistance and advice with confocal  
590 microscopy. We also thank Dr. Daniel Billadeau for sharing the VPS35 shRNA  
591 suppression/rescue constructs. Finally, we thank Dr. Simone Eicher for help with the RSA  
592 analysis and critical discussions. The genome sequence used in this research was derived from  
593 a HeLa cell line. Henrietta Lacks, and the HeLa cell line that was established from her tumor  
594 cells without her knowledge or consent in 1951, have made significant contributions to  
595 scientific progress and advances in human health. We are grateful to Henrietta Lacks, now  
596 deceased, and to her surviving family members for their contributions to biomedical  
597 research. This study was reviewed by the NIH HeLa Genome Data Access Working Group  
598 (<http://acd.od.nih.gov/hlgda.htm>). The genomic datasets used for analysis described in this  
599 manuscript were obtained from the database of Genotypes and Phenotypes (dbGaP) through  
600 dbGaP accession number phs000640.v1.p1. This work was supported by grants  
601 31003A\_173119 to CD from the Swiss National Science Foundation (SNSF, [www.snf.ch](http://www.snf.ch)),  
602 advanced grant 340330 to CD (FicModFun) from the European Research Council (ERC), grant  
603 51RTP0\_151029 to CD for the Research and Technology Development (RTD) project  
604 TargetInfectX in the frame of SystemsX.ch ([www.systemX.ch](http://www.systemX.ch)), the Swiss Initiative for System  
605 Biology. AC and SH were fellows of the ‘Fellowship of Excellence’ International PhD program  
606 of the Biozentrum, University of Basel, Switzerland. HB benefited from the SNSF Flexibility  
607 Grant.  
608 AC and SL performed all genome-wide siRNA screening, AC performed the entry assays, ME,  
609 KS, and AC designed and performed the image analysis for the screening and entry assays.

610 MQ, AC, and HB performed the analysis of the genome-wide datasets. MQ and AC analyzed  
611 the entry assay datasets. TT, SL, and HB designed and performed the VPS35 rescue  
612 experiment. TT and JS designed and performed the single cell experiment. TT, MQ, and MK.  
613 performed the CFU and WB experiments. MQ and JS analyzed the single cell data. MQ, AC  
614 and CD wrote the manuscript. CD provided strategic leadership for the project, designed  
615 experiments, and discussed data. The authors declare no competing interests.

616

## 617 **References**

- 618 1. Creasey EA, Isberg RR. 2014. Maintenance of vacuole integrity by bacterial pathogens.  
619 *Curr Opin Microbiol* 17:46-52.
- 620 2. Di Russo Case E, Samuel JE. 2016. Contrasting lifestyles within the host cell. *Microbiol*  
621 *Spectr* 4.
- 622 3. Weber MM, Faris R. 2018. Subversion of the endocytic and secretory pathways by  
623 bacterial effector proteins. *Front Cell Dev Biol* 6:1.
- 624 4. Havelaar AH, Kirk MD, Torgerson PR, Gibb HJ, Hald T, Lake RJ, Praet N, Bellinger  
625 DC, de Silva NR, Gargouri N, Speybroeck N, Cawthorne A, Mathers C, Stein C,  
626 Angulo FJ, Devleeschauwer B, World Health Organization Foodborne Disease  
627 Burden Epidemiology Reference G. 2015. World Health Organization global estimates  
628 and regional comparisons of the burden of foodborne disease in 2010. *PLoS Med*  
629 12:e1001923.
- 630 5. Moreno E. 2014. Retrospective and prospective perspectives on zoonotic brucellosis.  
631 *Front Microbiol* 5:213.
- 632 6. Pappas G, Papadimitriou P, Akritidis N, Christou L, Tsianos EV. 2006. The new global  
633 map of human brucellosis. *Lancet Infect Dis* 6:91-9.

- 634 7. Ariza J, Bosilkovski M, Cascio A, Colmenero JD, Corbel MJ, Falagas ME, Memish  
635 ZA, Roushan MR, Rubinstein E, Sipsas NV, Solera J, Young EJ, Pappas G,  
636 International Society of C, Institute of Continuing Medical Education of I. 2007.  
637 Perspectives for the treatment of brucellosis in the 21st century: the Ioannina  
638 recommendations. PLoS Med 4:e317.
- 639 8. Sedzicki J, Tschon T, Low SH, Willemart K, Goldie KN, Letesson JJ, Stahlberg H,  
640 Dehio C. 2018. 3D correlative electron microscopy reveals continuity of *Brucella*-  
641 containing vacuoles with the endoplasmic reticulum. J Cell Sci 131.
- 642 9. Pizarro-Cerda J, Meresse S, Parton RG, van der Goot G, Sola-Landa A, Lopez-Goni I,  
643 Moreno E, Gorvel JP. 1998. *Brucella abortus* transits through the autophagic pathway  
644 and replicates in the endoplasmic reticulum of nonprofessional phagocytes. Infect  
645 Immun 66:5711-24.
- 646 10. Starr T, Ng TW, Wehrly TD, Knodler LA, Celli J. 2008. *Brucella* intracellular  
647 replication requires trafficking through the late endosomal/lysosomal compartment.  
648 Traffic 9:678-94.
- 649 11. Castaneda-Roldan EI, Avelino-Flores F, Dall'Agnol M, Freer E, Cedillo L, Dornand J,  
650 Giron JA. 2004. Adherence of *Brucella* to human epithelial cells and macrophages is  
651 mediated by sialic acid residues. Cell Microbiol 6:435-45.
- 652 12. Castaneda-Roldan EI, Ouahrani-Bettache S, Saldana Z, Avelino F, Rendon MA,  
653 Dornand J, Giron JA. 2006. Characterization of SP41, a surface protein of *Brucella*  
654 associated with adherence and invasion of host epithelial cells. Cell Microbiol 8:1877-  
655 87.
- 656 13. Guzman-Verri C, Chaves-Olarte E, von Eichel-Streiber C, Lopez-Goni I, Thelestam M,  
657 Arvidson S, Gorvel JP, Moreno E. 2001. GTPases of the Rho subfamily are required

- 658 for *Brucella abortus* internalization in nonprofessional phagocytes: direct activation of  
659 Cdc42. J Biol Chem 276:44435-43.
- 660 14. Arellano-Reynoso B, Lapaque N, Salcedo S, Briones G, Ciocchini AE, Ugalde R,  
661 Moreno E, Moriyon I, Gorvel JP. 2005. Cyclic beta-1,2-glucan is a *Brucella* virulence  
662 factor required for intracellular survival. Nat Immunol 6:618-25.
- 663 15. Bellaire BH, Roop RM, 2nd, Cardelli JA. 2005. Opsonized virulent *Brucella abortus*  
664 replicates within nonacidic, endoplasmic reticulum-negative, LAMP-1-positive  
665 phagosomes in human monocytes. Infect Immun 73:3702-13.
- 666 16. Celli J, de Chastellier C, Franchini DM, Pizarro-Cerda J, Moreno E, Gorvel JP. 2003.  
667 *Brucella* evades macrophage killing via VirB-dependent sustained interactions with the  
668 endoplasmic reticulum. J Exp Med 198:545-56.
- 669 17. Boschirololi ML, Ouahrani-Bettache S, Foulongne V, Michaux-Charachon S, Bourg G,  
670 Allardet-Servent A, Cazevieille C, Liautard JP, Ramuz M, O'Callaghan D. 2002. The  
671 *Brucella suis virB* operon is induced intracellularly in macrophages. Proc Natl Acad  
672 Sci U S A 99:1544-9.
- 673 18. Comerci DJ, Martinez-Lorenzo MJ, Sieira R, Gorvel JP, Ugalde RA. 2001. Essential  
674 role of the VirB machinery in the maturation of the *Brucella abortus*-containing  
675 vacuole. Cell Microbiol 3:159-68.
- 676 19. Ke Y, Wang Y, Li W, Chen Z. 2015. Type IV secretion system of *Brucella* spp. and its  
677 effectors. Front Cell Infect Microbiol 5:72.
- 678 20. Miller CN, Smith EP, Cundiff JA, Knodler LA, Bailey Blackburn J, Lupashin V, Celli  
679 J. 2017. A *Brucella* type IV effector targets the COG tethering complex to remodel host  
680 secretory traffic and promote intracellular replication. Cell Host Microbe 22:317-329  
681 e7.

- 682 21. Franceschini A, Meier R, Casanova A, Kreibich S, Daga N, Andritschke D, Dilling S,  
683 Ramo P, Emmenlauer M, Kaufmann A, Conde-Alvarez R, Low SH, Pelkmans L,  
684 Helenius A, Hardt WD, Dehio C, von Mering C. 2014. Specific inhibition of diverse  
685 pathogens in human cells by synthetic microRNA-like oligonucleotides inferred from  
686 RNAi screens. *Proc Natl Acad Sci U S A* 111:4548-53.
- 687 22. Ramo P, Drewek A, Arrieumerlou C, Beerenwinkel N, Ben-Tekaya H, Cardel B,  
688 Casanova A, Conde-Alvarez R, Cossart P, Csucs G, Eicher S, Emmenlauer M, Greber  
689 U, Hardt WD, Helenius A, Kasper C, Kaufmann A, Kreibich S, Kuhbacher A, Kunszt  
690 P, Low SH, Mercer J, Mudrak D, Muntwiler S, Pelkmans L, Pizarro-Cerda J, Podvinec  
691 M, Pujadas E, Rinn B, Rouilly V, Schmich F, Siebourg-Polster J, Snijder B, Stebler M,  
692 Studer G, Szczurek E, Truttmann M, von Mering C, Vonderheit A, Yakimovich A,  
693 Buhlmann P, Dehio C. 2014. Simultaneous analysis of large-scale RNAi screens for  
694 pathogen entry. *BMC Genomics* 15:1162.
- 695 23. Québatte M, Dehio C. 2017. Systems-level interference strategies to decipher host  
696 factors involved in bacterial pathogen interaction: from RNAi to CRISPRi. *Curr Opin*  
697 *Microbiol* 39:34-41.
- 698 24. Zhu J, Davoli T, Perriera JM, Chin CR, Gaiha GD, John SP, Sigiollot FD, Gao G, Xu  
699 Q, Qu H, Pertel T, Sims JS, Smith JA, Baker RE, Maranda L, Ng A, Elledge SJ, Brass  
700 AL. 2014. Comprehensive identification of host modulators of HIV-1 replication using  
701 multiple orthologous RNAi reagents. *Cell Rep* 9:752-66.
- 702 25. Konig R, Chiang CY, Tu BP, Yan SF, DeJesus PD, Romero A, Bergauer T, Orth A,  
703 Krueger U, Zhou Y, Chanda SK. 2007. A probability-based approach for the analysis  
704 of large-scale RNAi screens. *Nat Methods* 4:847-9.
- 705 26. Huang da W, Sherman BT, Lempicki RA. 2009. Systematic and integrative analysis of  
706 large gene lists using DAVID bioinformatics resources. *Nat Protoc* 4:44-57.

- 707 27. Szklarczyk D, Morris JH, Cook H, Kuhn M, Wyder S, Simonovic M, Santos A,  
708 Doncheva NT, Roth A, Bork P, Jensen LJ, von Mering C. 2017. The STRING database  
709 in 2017: quality-controlled protein-protein association networks, made broadly  
710 accessible. *Nucleic Acids Res* 45:D362-D368.
- 711 28. Keriél A, Botella E, Estrach S, Bragagnolo G, Vergunst AC, Feral CC, O'Callaghan D.  
712 2015. *Brucella* intracellular life relies on the transmembrane protein CD98 heavy chain.  
713 *J Infect Dis* 211:1769-78.
- 714 29. Casanova A, Low SH, Emmenlauer M, Conde-Alvarez R, Salcedo SP, Gorvel JP,  
715 Dehio C. 2016. Microscopy-based assays for high-throughput screening of host factors  
716 involved in *Brucella* infection of HeLa cells. *J Vis Exp*  
717 doi:<https://www.doi.org/10.3791/54263>.
- 718 30. Morth JP, Pedersen BP, Buch-Pedersen MJ, Andersen JP, Vilsen B, Palmgren MG,  
719 Nissen P. 2011. A structural overview of the plasma membrane Na<sup>+</sup>,K<sup>+</sup>-ATPase and  
720 H<sup>+</sup>-ATPase ion pumps. *Nat Rev Mol Cell Biol* 12:60-70.
- 721 31. Siezen RJ, Leunissen JA. 1997. Subtilases: the superfamily of subtilisin-like serine  
722 proteases. *Protein Sci* 6:501-23.
- 723 32. Gallon M, Cullen PJ. 2015. Retromer and sorting nexins in endosomal sorting. *Biochem*  
724 *Soc Trans* 43:33-47.
- 725 33. Wang J, Fedoseienko A, Chen B, Burstein E, Jia D, Billadeau DD. 2018. Endosomal  
726 receptor trafficking: Retromer and beyond. *Traffic* 19:578-590.
- 727 34. Linxweiler M, Schick B, Zimmermann R. 2017. Let's talk about Secs: Sec61, Sec62  
728 and Sec63 in signal transduction, oncology and personalized medicine. *Signal*  
729 *Transduct Target Ther* 2:17002.

- 730 35. Qin QM, Pei J, Ancona V, Shaw BD, Ficht TA, de Figueiredo P. 2008. RNAi screen of  
731 endoplasmic reticulum-associated host factors reveals a role for IRE1alpha in  
732 supporting *Brucella* replication. PLoS Pathog 4:e1000110.
- 733 36. Steinberg F, Gallon M, Winfield M, Thomas EC, Bell AJ, Heesom KJ, Tavare JM,  
734 Cullen PJ. 2013. A global analysis of SNX27-retromer assembly and cargo specificity  
735 reveals a function in glucose and metal ion transport. Nat Cell Biol 15:461-71.
- 736 37. Temkin P, Lauffer B, Jager S, Cimermancic P, Krogan NJ, von Zastrow M. 2011.  
737 SNX27 mediates retromer tubule entry and endosome-to-plasma membrane trafficking  
738 of signalling receptors. Nat Cell Biol 13:715-21.
- 739 38. Seaman MN, McCaffery JM, Emr SD. 1998. A membrane coat complex essential for  
740 endosome-to-Golgi retrograde transport in yeast. J Cell Biol 142:665-81.
- 741 39. Kvainickas A, Jimenez-Orgaz A, Nagele H, Hu Z, Dengjel J, Steinberg F. 2017. Cargo-  
742 selective SNX-BAR proteins mediate retromer trimer independent retrograde transport.  
743 J Cell Biol 216:3677-3693.
- 744 40. Simonetti B, Danson CM, Heesom KJ, Cullen PJ. 2017. Sequence-dependent cargo  
745 recognition by SNX-BARs mediates retromer-independent transport of CI-MPR. J Cell  
746 Biol 216:3695-3712.
- 747 41. Liu TT, Gomez TS, Sackey BK, Billadeau DD, Burd CG. 2012. Rab GTPase regulation  
748 of retromer-mediated cargo export during endosome maturation. Mol Biol Cell  
749 23:2505-15.
- 750 42. Elwell C, Engel J. 2018. Emerging role of retromer in modulating pathogen growth.  
751 Trends Microbiol 26:769-780.
- 752 43. Personnic N, Barlocher K, Finsel I, Hilbi H. 2016. Subversion of retrograde trafficking  
753 by translocated pathogen effectors. Trends Microbiol 24:450-462.

- 754 44. Elwell CA, Czudnochowski N, von Dollen J, Johnson JR, Nakagawa R, Mirrashidi K,  
755 Krogan NJ, Engel JN, Rosenberg OS. 2017. *Chlamydia* interfere with an interaction  
756 between the mannose-6-phosphate receptor and sorting nexins to counteract host  
757 restriction. *Elife* 6.
- 758 45. Mirrashidi KM, Elwell CA, Verschueren E, Johnson JR, Frando A, Von Dollen J,  
759 Rosenberg O, Gulbahce N, Jang G, Johnson T, Jager S, Gopalakrishnan AM, Sherry J,  
760 Dunn JD, Olive A, Penn B, Shales M, Cox JS, Starnbach MN, Derre I, Valdivia R,  
761 Krogan NJ, Engel J. 2015. Global mapping of the Inc-human interactome reveals that  
762 retromer restricts chlamydia infection. *Cell Host Microbe* 18:109-21.
- 763 46. Yin P, Hong Z, Yang X, Chung RT, Zhang L. 2016. A role for retromer in hepatitis C  
764 virus replication. *Cell Mol Life Sci* 73:869-81.
- 765 47. Yao J, Yang F, Sun X, Wang S, Gan N, Liu Q, Liu D, Zhang X, Niu D, Wei Y, Ma C,  
766 Luo ZQ, Sun Q, Jia D. 2018. Mechanism of inhibition of retromer transport by the  
767 bacterial effector RidL. *Proc Natl Acad Sci U S A* 115:E1446-E1454.
- 768 48. Romano-Moreno M, Rojas AL, Williamson CD, Gershlick DC, Lucas M, Isupov MN,  
769 Bonifacino JS, Machner MP, Hierro A. 2017. Molecular mechanism for the subversion  
770 of the retromer coat by the *Legionella* effector RidL. *Proc Natl Acad Sci U S A*  
771 114:E11151-E11160.
- 772 49. Barlocher K, Hutter CAJ, Swart AL, Steiner B, Welin A, Hohl M, Letourneur F, Seeger  
773 MA, Hilbi H. 2017. Structural insights into *Legionella* RidL-Vps29 retromer subunit  
774 interaction reveal displacement of the regulator TBC1D5. *Nat Commun* 8:1543.
- 775 50. Patrick KL, Wojcechowskyj JA, Bell SL, Riba MN, Jing T, Talmage S, Xu P, Cabello  
776 AL, Xu J, Shales M, Jimenez-Morales D, Ficht TA, de Figueiredo P, Samuel JE, Li P,  
777 Krogan NJ, Watson RO. 2018. Quantitative yeast genetic interaction profiling of



- 778 bacterial effector proteins uncovers a role for the human retromer in *Salmonella*  
779 infection. *Cell Syst* 7:323-338 e6.
- 780 51. Harbour ME, Breusegem SY, Antrobus R, Freeman C, Reid E, Seaman MN. 2010. The  
781 cargo-selective retromer complex is a recruiting hub for protein complexes that regulate  
782 endosomal tubule dynamics. *J Cell Sci* 123:3703-17.
- 783 52. Harrison MS, Hung CS, Liu TT, Christiano R, Walther TC, Burd CG. 2014. A  
784 mechanism for retromer endosomal coat complex assembly with cargo. *Proc Natl Acad*  
785 *Sci U S A* 111:267-72.
- 786 53. Seaman MN, Harbour ME, Tattersall D, Read E, Bright N. 2009. Membrane  
787 recruitment of the cargo-selective retromer subcomplex is catalysed by the small  
788 GTPase Rab7 and inhibited by the Rab-GAP TBC1D5. *J Cell Sci* 122:2371-82.
- 789 54. Jimenez-Orgaz A, Kvainickas A, Nagele H, Denner J, Eimer S, Dengjel J, Steinberg F.  
790 2018. Control of RAB7 activity and localization through the retromer-TBC1D5  
791 complex enables RAB7-dependent mitophagy. *EMBO J* 37:235-254.
- 792 55. Lee JJ, Kim DG, Kim DH, Simborio HL, Min W, Lee HJ, Her M, Jung SC, Watarai M,  
793 Kim S. 2013. Interplay between clathrin and Rab5 controls the early phagocytic  
794 trafficking and intracellular survival of *Brucella abortus* within HeLa cells. *J Biol*  
795 *Chem* 288:28049-57.
- 796 56. Elfaki MG, Al-Hokail AA. 2009. Transforming growth factor beta production  
797 correlates with depressed lymphocytes function in humans with chronic brucellosis.  
798 *Microbes Infect* 11:1089-96.
- 799 57. Goenka R, Parent MA, Elzer PH, Baldwin CL. 2011. B cell-deficient mice display  
800 markedly enhanced resistance to the intracellular bacterium *Brucella abortus*. *J Infect*  
801 *Dis* 203:1136-46.

- 802 58. Celli J, Salcedo SP, Gorvel JP. 2005. *Brucella* coopts the small GTPase Sar1 for  
803 intracellular replication. Proc Natl Acad Sci U S A 102:1673-8.
- 804 59. Thanbichler M, Iniesta AA, Shapiro L. 2007. A comprehensive set of plasmids for  
805 vanillate- and xylose-inducible gene expression in *Caulobacter crescentus*. Nucleic  
806 Acids Res 35:e137.
- 807 60. Smith K, Li Y, Piccinini F, Csucs G, Balazs C, Bevilacqua A, Horvath P. 2015. CIDRE:  
808 an illumination-correction method for optical microscopy. Nat Methods 12:404-6.
- 809 61. Carpenter AE, Jones TR, Lamprecht MR, Clarke C, Kang IH, Friman O, Guertin DA,  
810 Chang JH, Lindquist RA, Moffat J, Golland P, Sabatini DM. 2006. CellProfiler: image  
811 analysis software for identifying and quantifying cell phenotypes. Genome Biol  
812 7:R100.
- 813 62. Deghelt M, Mullier C, Sternon JF, Francis N, Laloux G, Dotreppe D, Van der Henst C,  
814 Jacobs-Wagner C, Letesson JJ, De Bolle X. 2014. G1-arrested newborn cells are the  
815 predominant infectious form of the pathogen *Brucella abortus*. Nat Commun 5:4366.
- 816 63. Keleher LL, Skyberg JA. 2016. Activation of bovine neutrophils by *Brucella* spp. Vet  
817 Immunol Immunopathol 177:1-6.
- 818 64. Starr T, Child R, Wehrly TD, Hansen B, Hwang S, Lopez-Otin C, Virgin HW, Celli J.  
819 2012. Selective subversion of autophagy complexes facilitates completion of the  
820 *Brucella* intracellular cycle. Cell Host Microbe 11:33-45.
- 821

822 **Figure legend (figure included for review)**

823 **Figure 1**

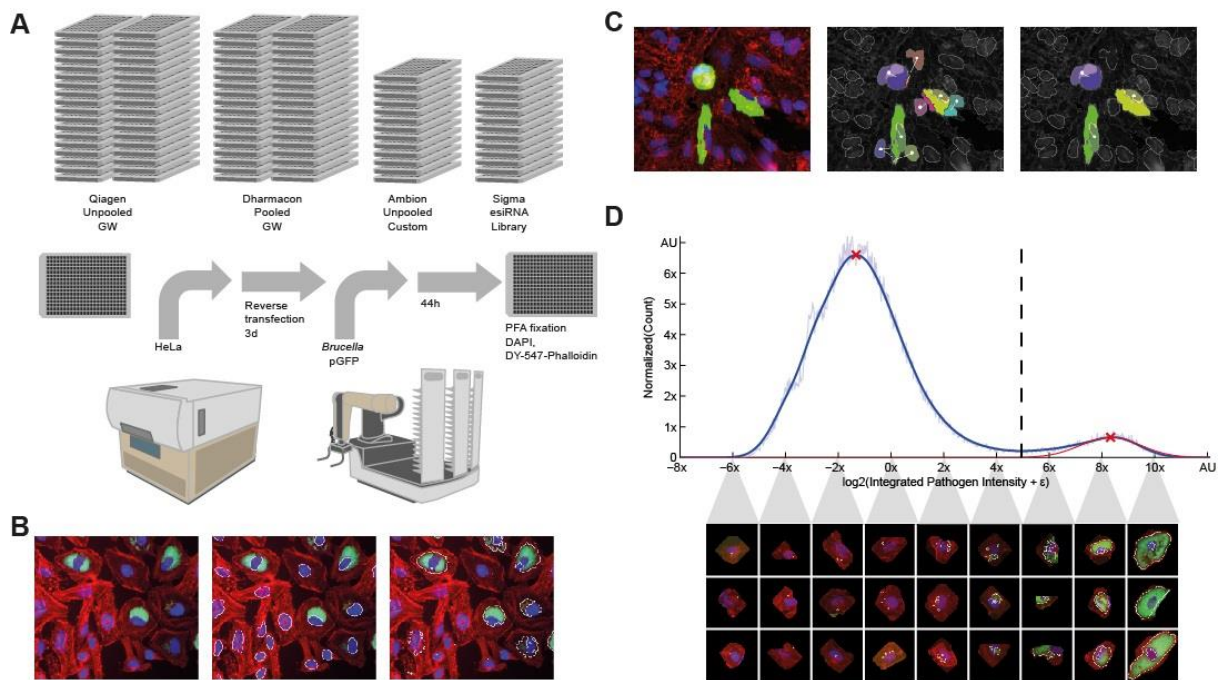

824

825 **Fig. 1 Overview of the high-content screening and analysis.** (A) Summary of RNAi

826 screening workflow. Reverse transfection of HeLa cells was performed in 384-well format for

827 72 h followed by 48 h infection with GFP expressing *B. abortus*, PFA fixation, and staining of

828 HeLa cells with DAPI and DY-547-Phalloidin before automated imaging. (B) Image analysis

829 was performed with CellProfiler to segment nuclei and bacteria and to extract measurements.

830 (C) Accurate association of segmented bacteria to nuclei enables quantitative single cell

831 measurements. The naive association (middle image) of segmented pathogen can be affected

832 by over-splitting in dense cell populations (left image). Our proposed solution (right image)

833 based on a nucleus attraction score. (D) The plate histogram shows the bimodal distribution of

834 integrated GFP intensity corresponding to *Brucella* replication. Intensity on the X-axis is  $\log_2$ -

835 scaled to account for exponential growth. The normal distribution fitted (red curve) to the

836 Kernel Density Estimation of the histogram allows to compute a robust binary infection

837 threshold (dashed line) separating HeLa cells with (right) and without (left) replicating

838 *Brucella*. Associated are samples of single-cell images corresponding to the intervals of the  
839 intensity distribution (for more details see Materials and Methods).

840 **Figure 2**

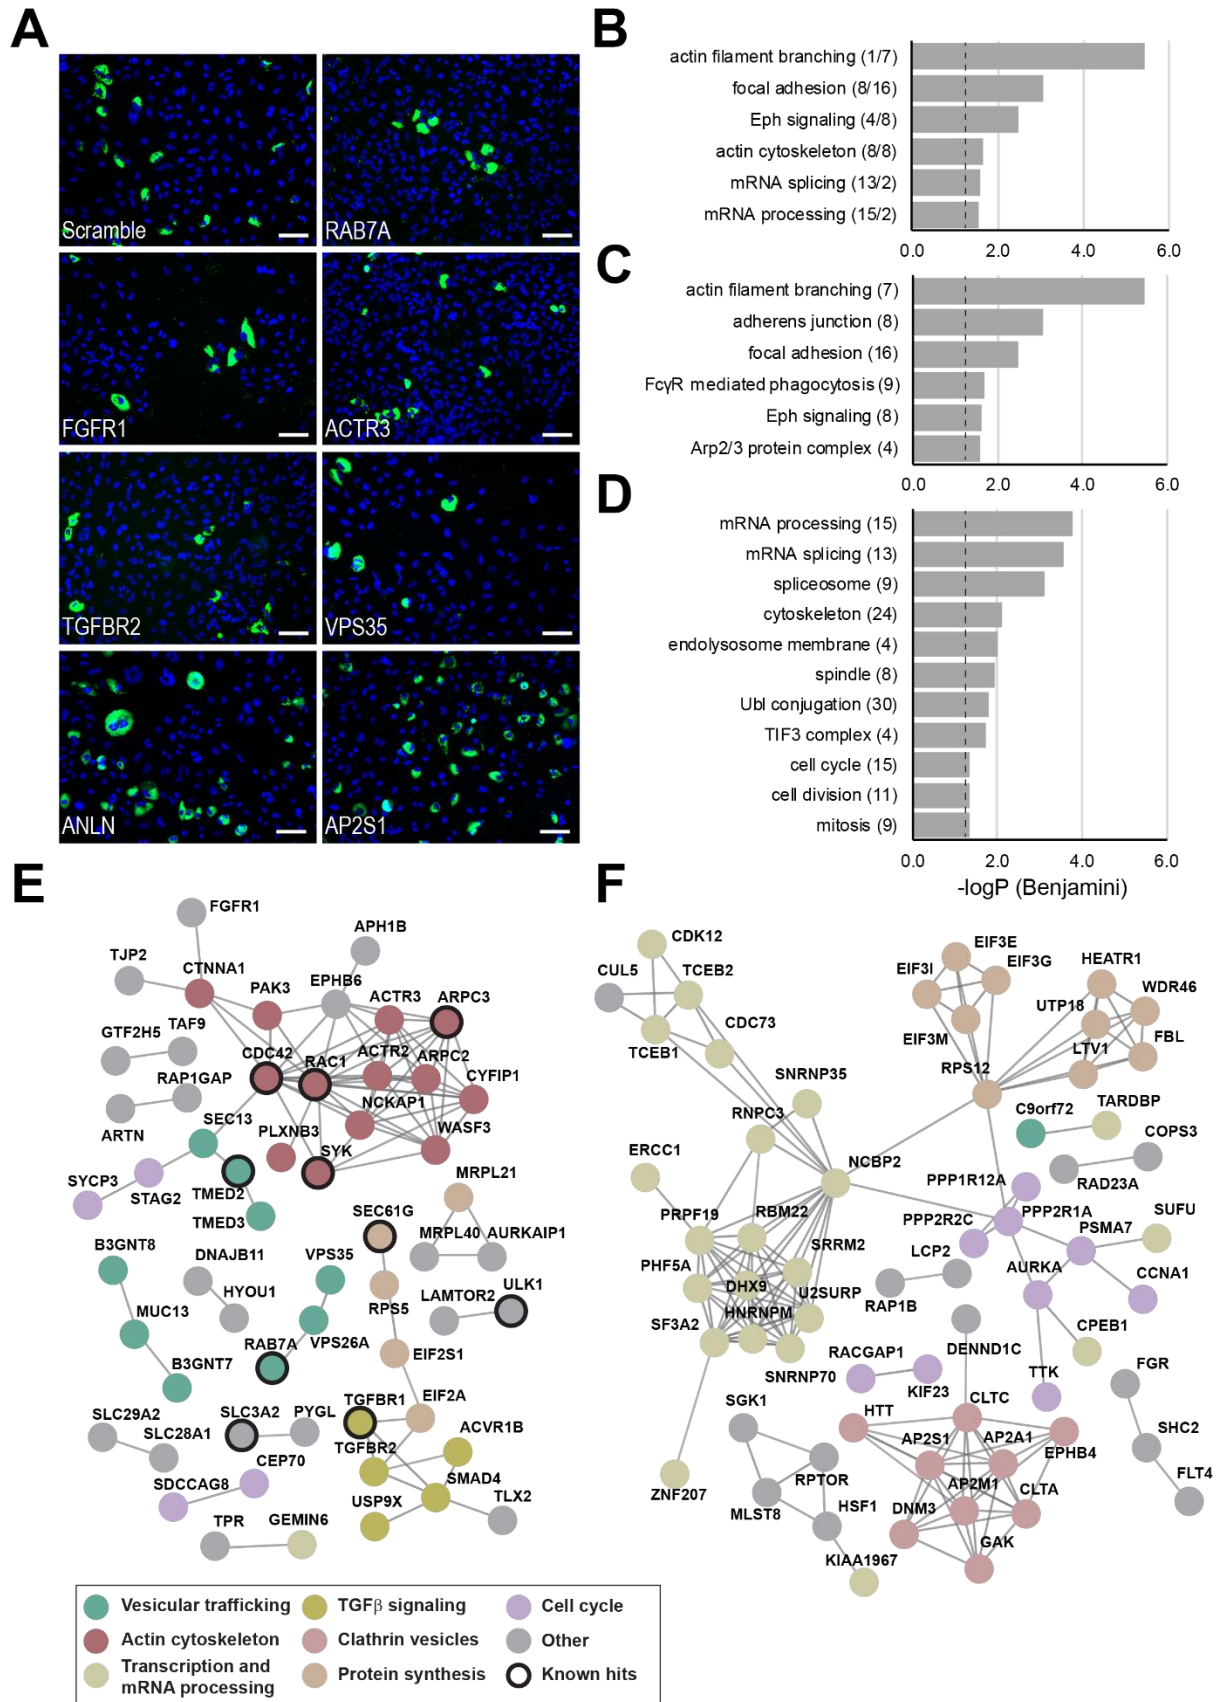

841

842 **Fig. 2 The human infectome for *Brucella* infection determined by genome-wide siRNA**  
843 **screening.** (A) Representative merged images from the genome wide screen showing nuclei  
844 (DAPI) and intracellular replication of GFP expressing *Brucella abortus* for either control  
845 conditions (scramble) or a panel of identified hits (RAB7A, FGFR1, ACTR3, TGFBR2,  
846 VPS35, ANLN and AP2S1). Scale bar = 100  $\mu$ m. (B, C, D) Results of gene ontology  
847 enrichment analysis (DAVID) for the entire hit list (B), the down- (C) or up-hits (D). The  
848  $[-\log_{10}]$  of the P-value associated to the different categories are indicated (cut-off: Benjamini  
849 corrected P-value  $\leq 0.01$ , with more than 3 hit wells) as well as the number of individual  
850 components associated to the displayed categories are indicated. In (B), the first number refers  
851 to down-hits and the second to up-hits. (E, F) High confidence protein-protein interaction  
852 networks ( $x \geq 0.8$ ) for the 223 RSA down- (A) or 202 up-hits (B) determined using the STRING  
853 database. Clusters with common predicted cellular function are colored and their prominent  
854 function are indicated. Hits previously reported to be involved in *Brucella* pathogenicity are  
855 highlighted: ARPC3 (29); TGFBR2 (22); SEC61G and TMED2 (35); RAC1 and CDC42 (13);  
856 SLC3A2 (28); RAB7A (10); SYK (63); ULK1 (64); For clarity, disconnected components are  
857 not displayed. The complete list of down- and up-hits is presented in Tables S1-S2. Data from  
858 single RNAi reagents for down- and up-hits is presented in Fig S2-S3.

859

860 **Figure 3**

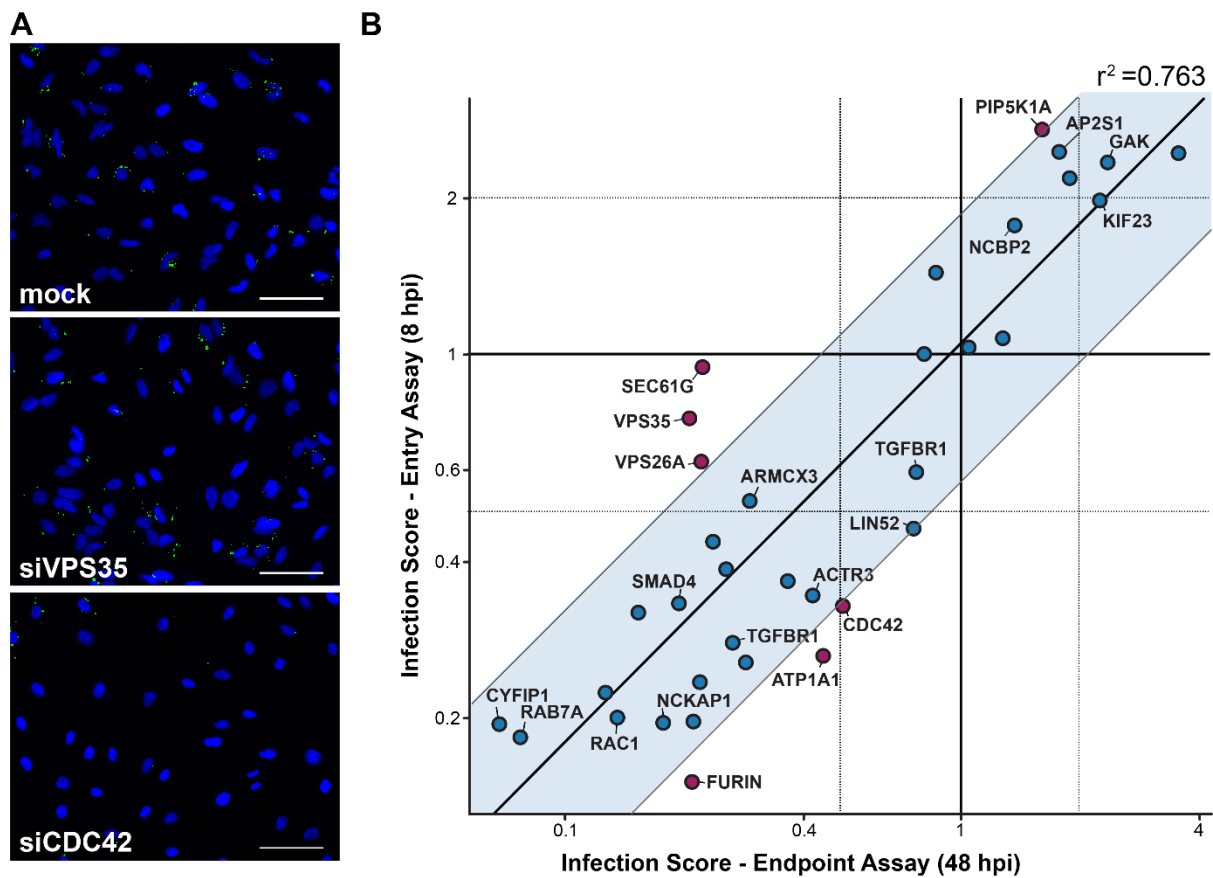

861

862 **Fig. 3 Entry assay identifies new components required for post-entry processes during**

863 ***Brucella* infection.** (A) Representative images from the entry assay showing nuclei (DAPI) of

864 HeLa cells and intracellular *Brucella abortus* (GFP) for control condition (mock) and cells

865 treated with siRNAs against CDC42 or VPS35. Scale bar = 100  $\mu$ m. HeLa cells were infected

866 with *B. abortus* expressing GFP under a tetracycline inducible system for 8 h (see Material and

867 Methods). (B) Scatter plot in double logarithmic scale showing infection scores measured for

868 the entry assay (8 hpi) versus endpoint assay (48 hpi), normalized to the respective mock

869 dataset (Table S3). For the entry assay, cells containing single bacteria were considered as

870 infected and the final readout is proportional to the median number of bacteria per infected

871 cells. For the endpoint assay, only cells containing replicating bacteria were considered as

872 infected (Fig. 1 and Materials and Methods). Each data point corresponds to the average of all

873 siRNAs or esiRNAs targeted against the gene of interest (n=3). The straight fit (oblique line,

874  $r^2 = 0.763$ ) indicates a globally high correlation between both assays. The blue box comprise  
875 all points within  $\pm 1$  SD to the fitted data. The genes falling out of this range are marked in red.  
876 For ease of visualization, only the averaged values over all RNAi products targeting a given  
877 gene are displayed.



878 **Figure 4**

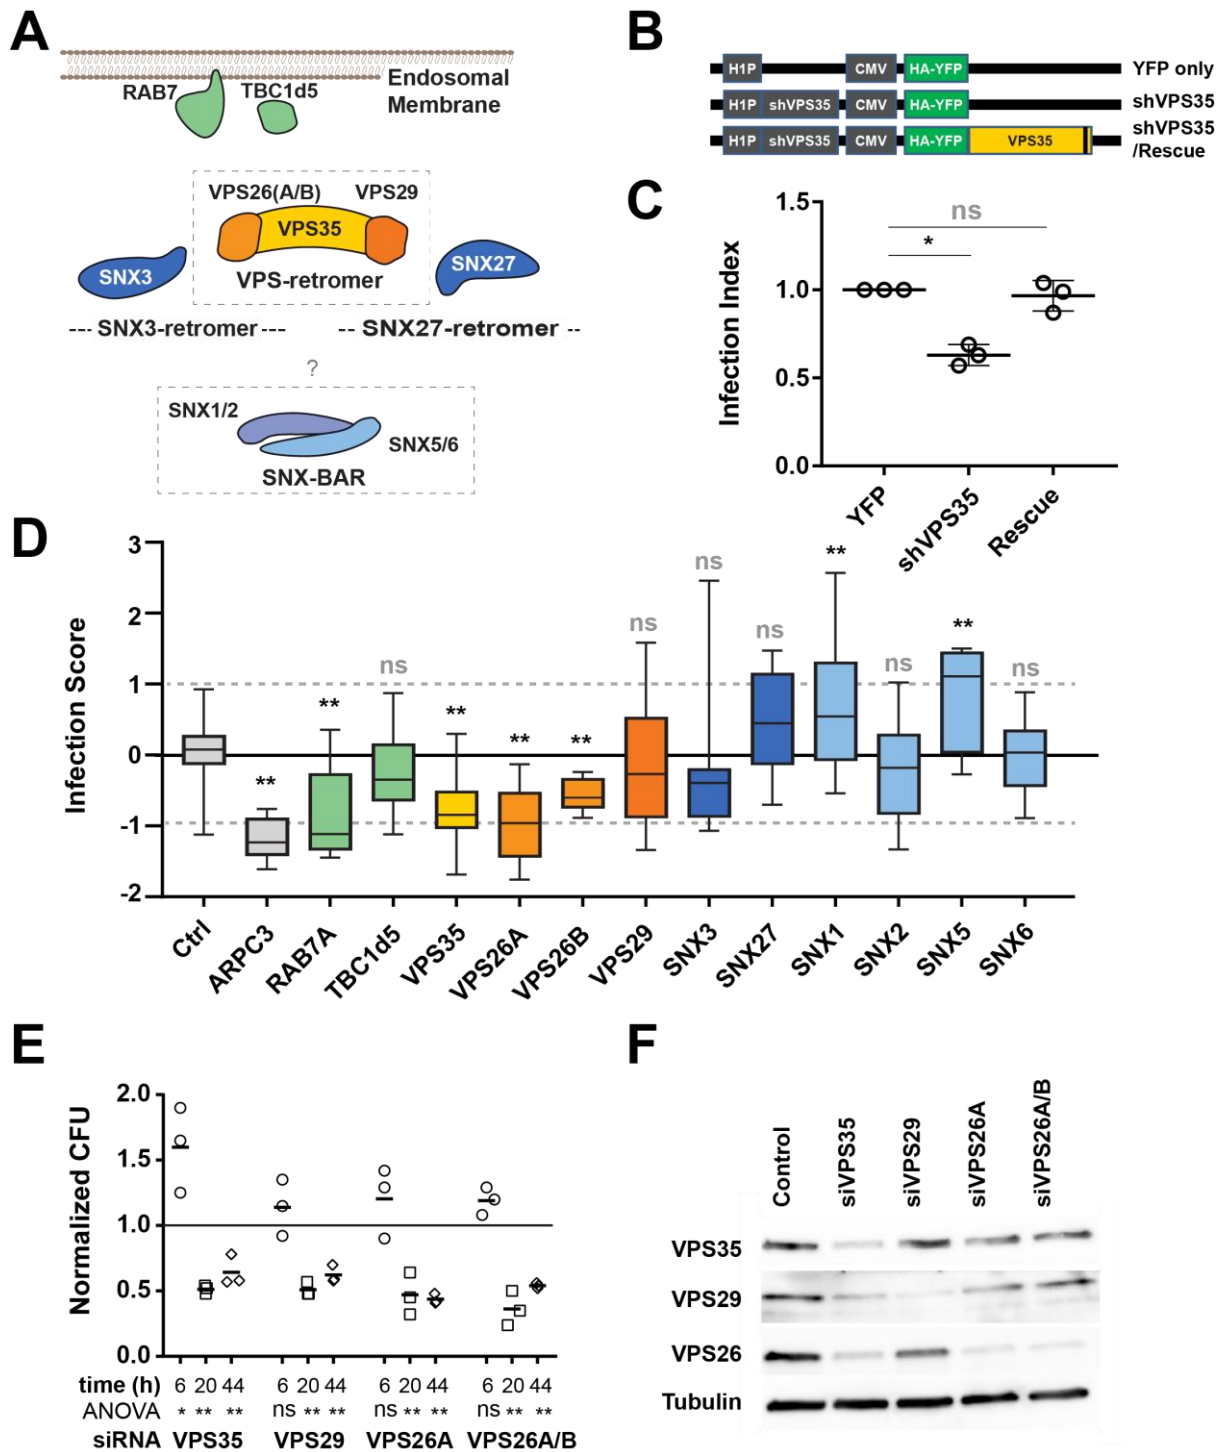

879

880 **Fig. 4 The VPS retromer is a key component of *Brucella* intracellular trafficking. (A)**

881 Schematic representation of the retromer components and their prominent interactors. (B)

882 Schematic representation of the shRNA constructs used in (C). The gray box on the shVPS35

883 /Rescue construct indicates the silent mutations that prevent recognition by to the co-expressed

884 shRNA (41). (C) Infection index from transfected cells. Displayed are the averaged infection  
885 index and associated standard deviation after 48 h of *Brucella* infection. Data was normalized  
886 to the YFP only condition (n=3). Asterisks indicate statistically significant difference to  
887 scrambled YPF only condition as determined by paired t-test (\* Pval  $\leq$  0.01, ns not significant).  
888 (D) Dot box representation of the z-scored infection score for components of the retromer and  
889 interactors, including the positive control ARPC3. Asterisks indicate statistically significant  
890 difference to scrambled siRNA-treated bacteria (Ctrl) as determined by one-way ANOVA and  
891 Dunnett's multiple comparisons test (\*\* Pval  $\leq$  0.001; ns not significant). (E) Normalized  
892 colony forming units (CFU) recovered from siRNA-treated cells a 6, 20 or 44 hpi. The  
893 presented data correspond to CFU count normalized to control-siRNA-treated cells (n=3).  
894 Significance was determined using One-way ANOVA with Dunnet's multiple comparison test  
895 (\* Pval  $\leq$  0.01; \*\*  $\leq$  0.001; ns not significant). (F) Western blot analysis of the indicated  
896 proteins in total lysate of Hela cells treated with siRNA targeting the designated genes, 72 h  
897 post transfection. Displayed is a representative example of an experiment performed in  
898 biological triplicate (n=3). See Table S4 for the matching averaged intensity quantification.

899 **Figure 5**

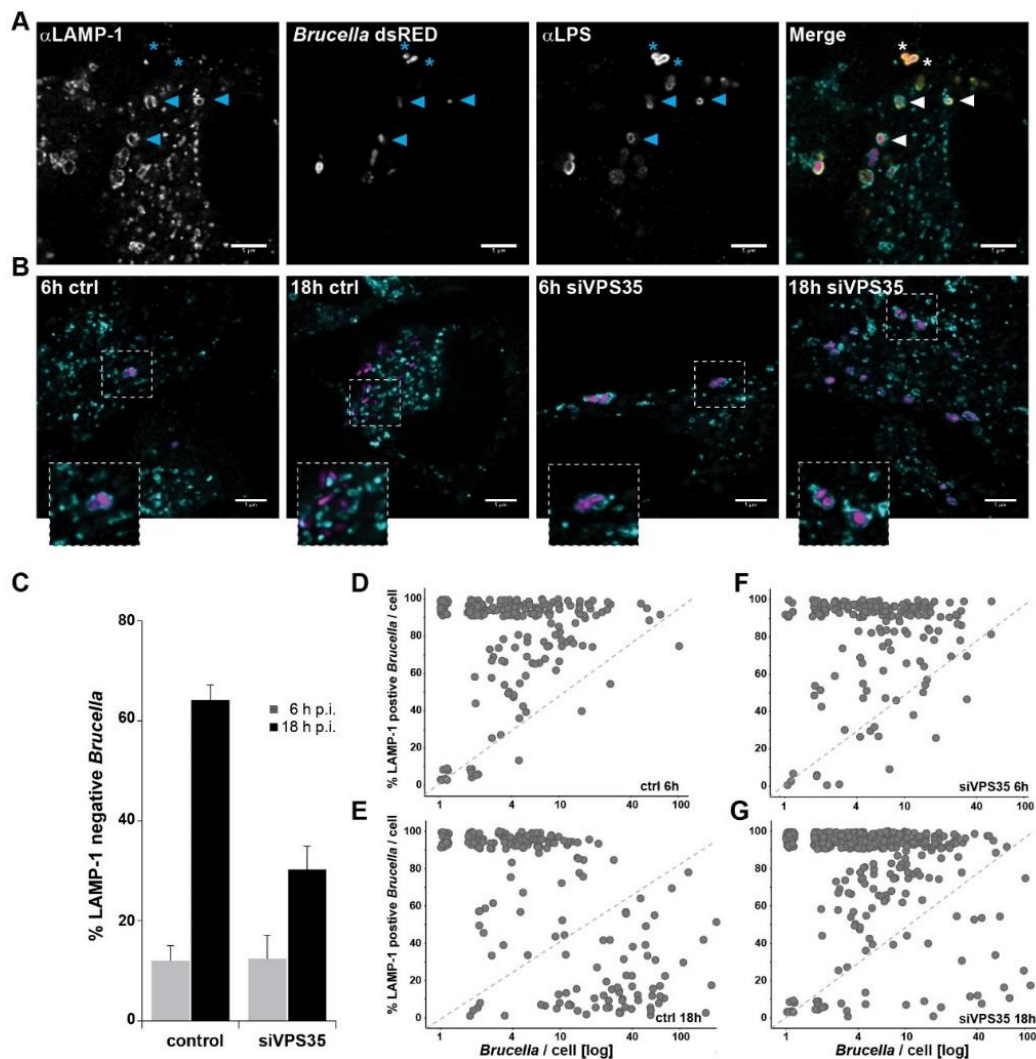

900

901 **Fig. 5 VPS35 is required for *Brucella* to escape the lysosomal pathway. (A)**

902 Immunofluorescence approach used to quantify localization of *Brucella* within LAMP-1

903 positive vesicles, illustrated with a representative example of control-treated cells 6 hpi.

904 Individual channels and merged picture are presented. Arrows indicate examples of co-

905 colocalization of bacteria with LAMP-1 positive compartments. Staining of *Brucella* LPS ( $\alpha$ LPS)

906 was used to confirm the presence of LAMP-1 in direct proximity of the bacterial surface.

907 Asterisks indicate examples of LAMP-1 negative *Brucella*. **(B)** Representative images from

908 *Brucella* infected cells either mock transfected (ctrl) or after VPS35 knockdown (siVPS35).

909 Samples were fixed 6 and 18 hpi. For clarity only the LAMP-1 (cyan) and dsRed (magenta)

910 channels are presented. Scale bar: 5  $\mu\text{m}$ . (C) Global quantification of LAMP-1 negative  
911 *Brucella*. Displayed are the average and associated standard deviation for more than 500  
912 bacteria and more than 50 Hela cells per time point and condition (n=3). (D) Single-cell data  
913 representation of the data presented in (C). Displayed is the distribution of LAMP-1 positive  
914 *Brucella* per cell as a function of the total number of bacteria counted in that given cell.  
915

916 Supporting information legends

917 Supporting Figure S1

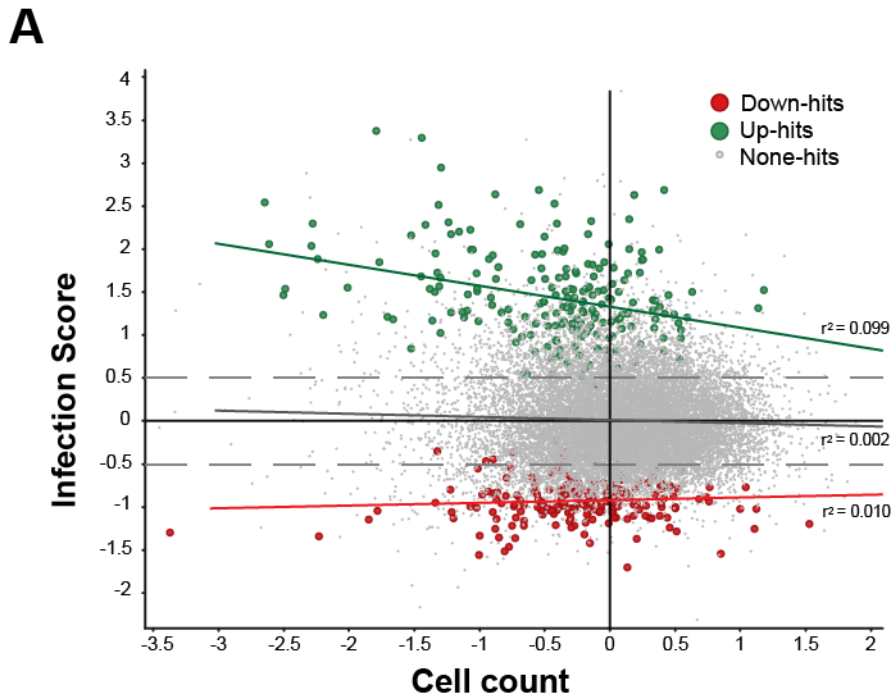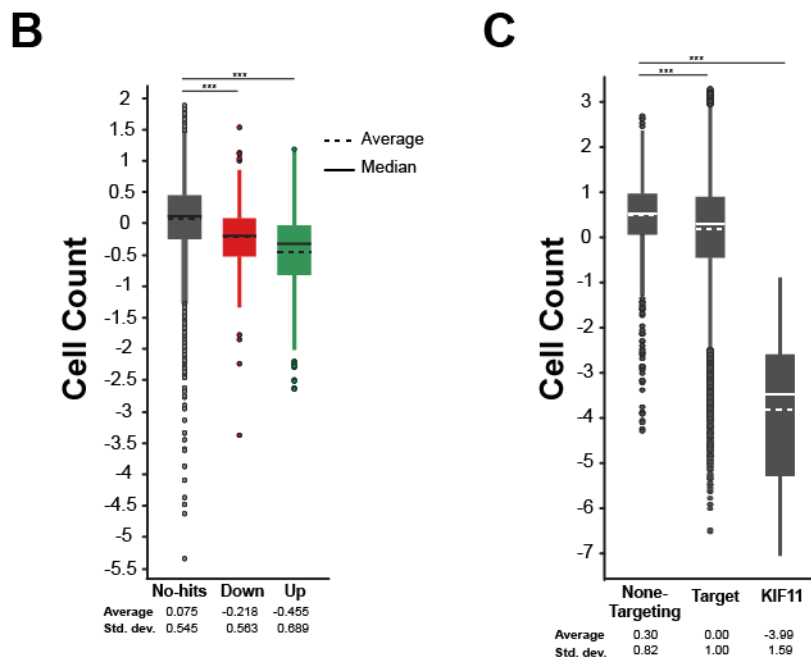

918

919 **Fig. S1. Overview of the genome-wide dataset.** (A) Scatter plot representation of the z-scored  
 920 averaged infection score plotted against the z-scored averaged cell count for all tested genes,  
 921 with up- and down-hits highlighted in green and red respectively. (A). Linear regression  
 922 between both parameters and associated  $r^2$  value are indicated, suggesting no direct correlation

923 between infection score and cell count. **(B)** Box-blot representing averaged cell count score  
924 (single gene level) for different hit categories. Albeit of rather modest amplitude, a highly  
925 significant decrease in mean cell count is observed for both up- and down-hits. **(C)** Box-blot  
926 representing averaged cell count score (averaged per siRNA) for the KIF11 control compared  
927 to all targeting siRNAs or non-targeting controls. Cell number reduction in KIF11-transfected  
928 cells reached 97.6% (91.5 – 99.99). Statistical test for (B, C): Unpaired t-test with Welch's  
929 correction, P-value < 0.0001.  
930

931 **Supporting Figure S2**

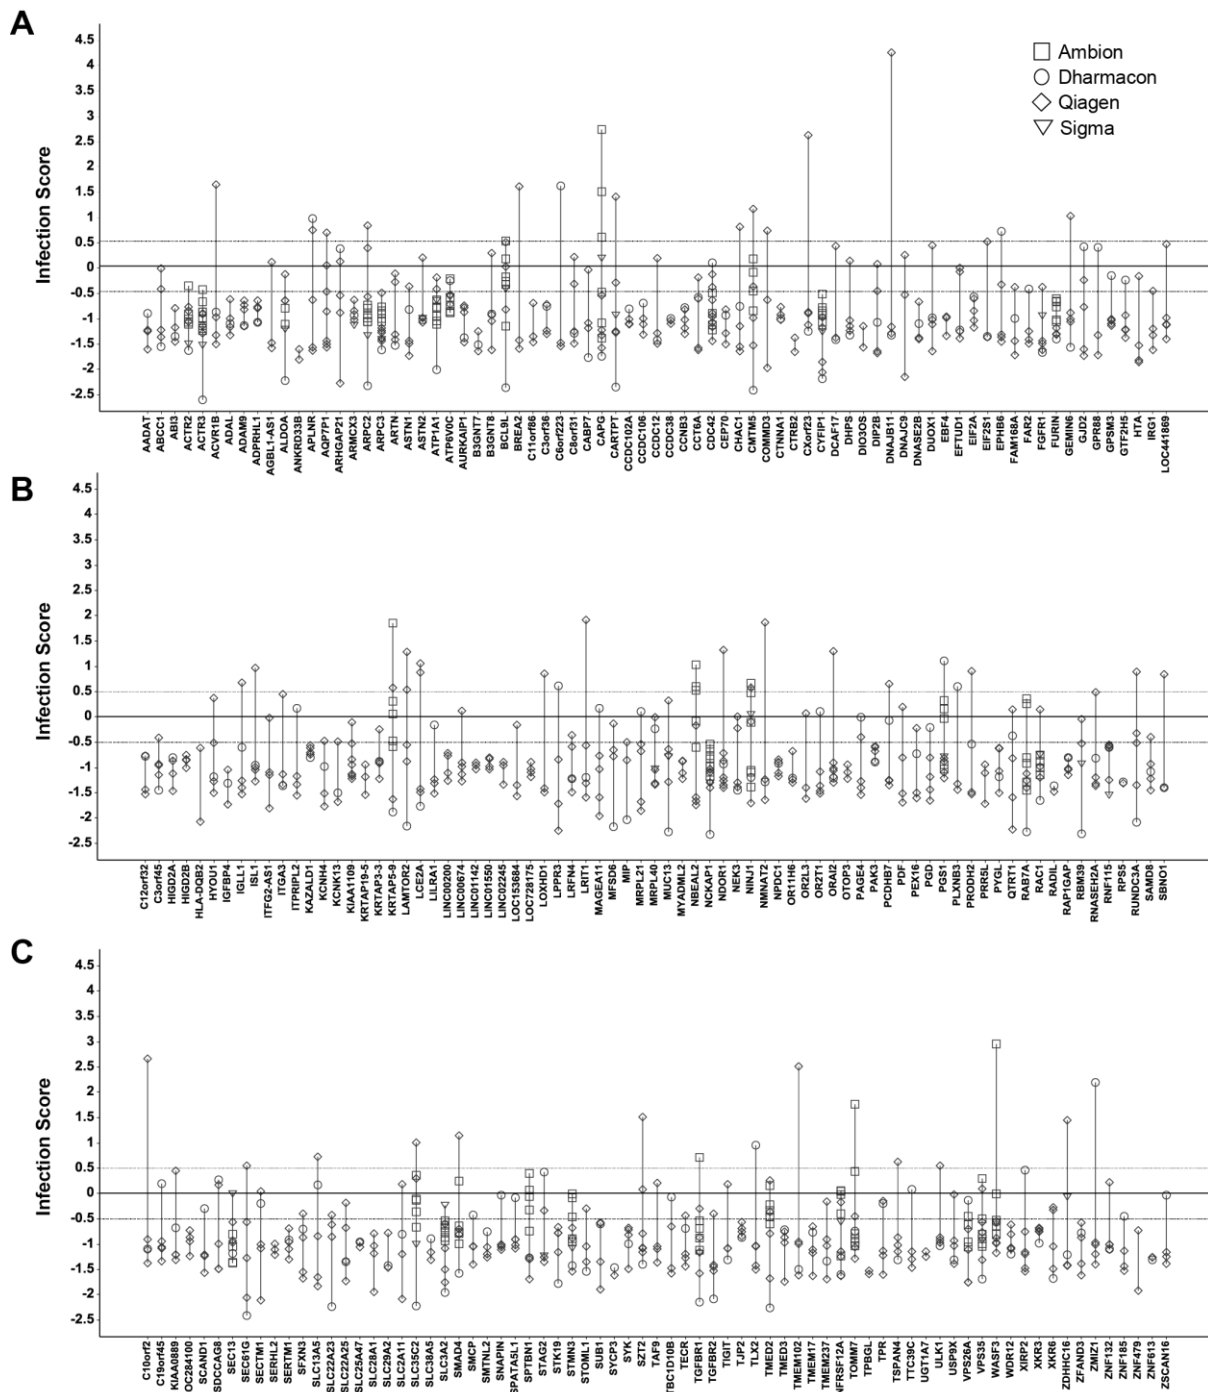

932

933 **Fig. S2 Data from single RNAi reagents for the selected 223 down-hits. (A-C) Averaged**

934 infection score (z-scored) and associated standard deviation for each of the 223 down-hits

935 (RSA analysis). Displayed are the results of each tested RNAi reagents (siRNA or esiRNA),

936 averaged by biological replicate. RNAi providers are differentiated by the shape used to

937 indicate the data point.

938 **Supporting Figure S3**

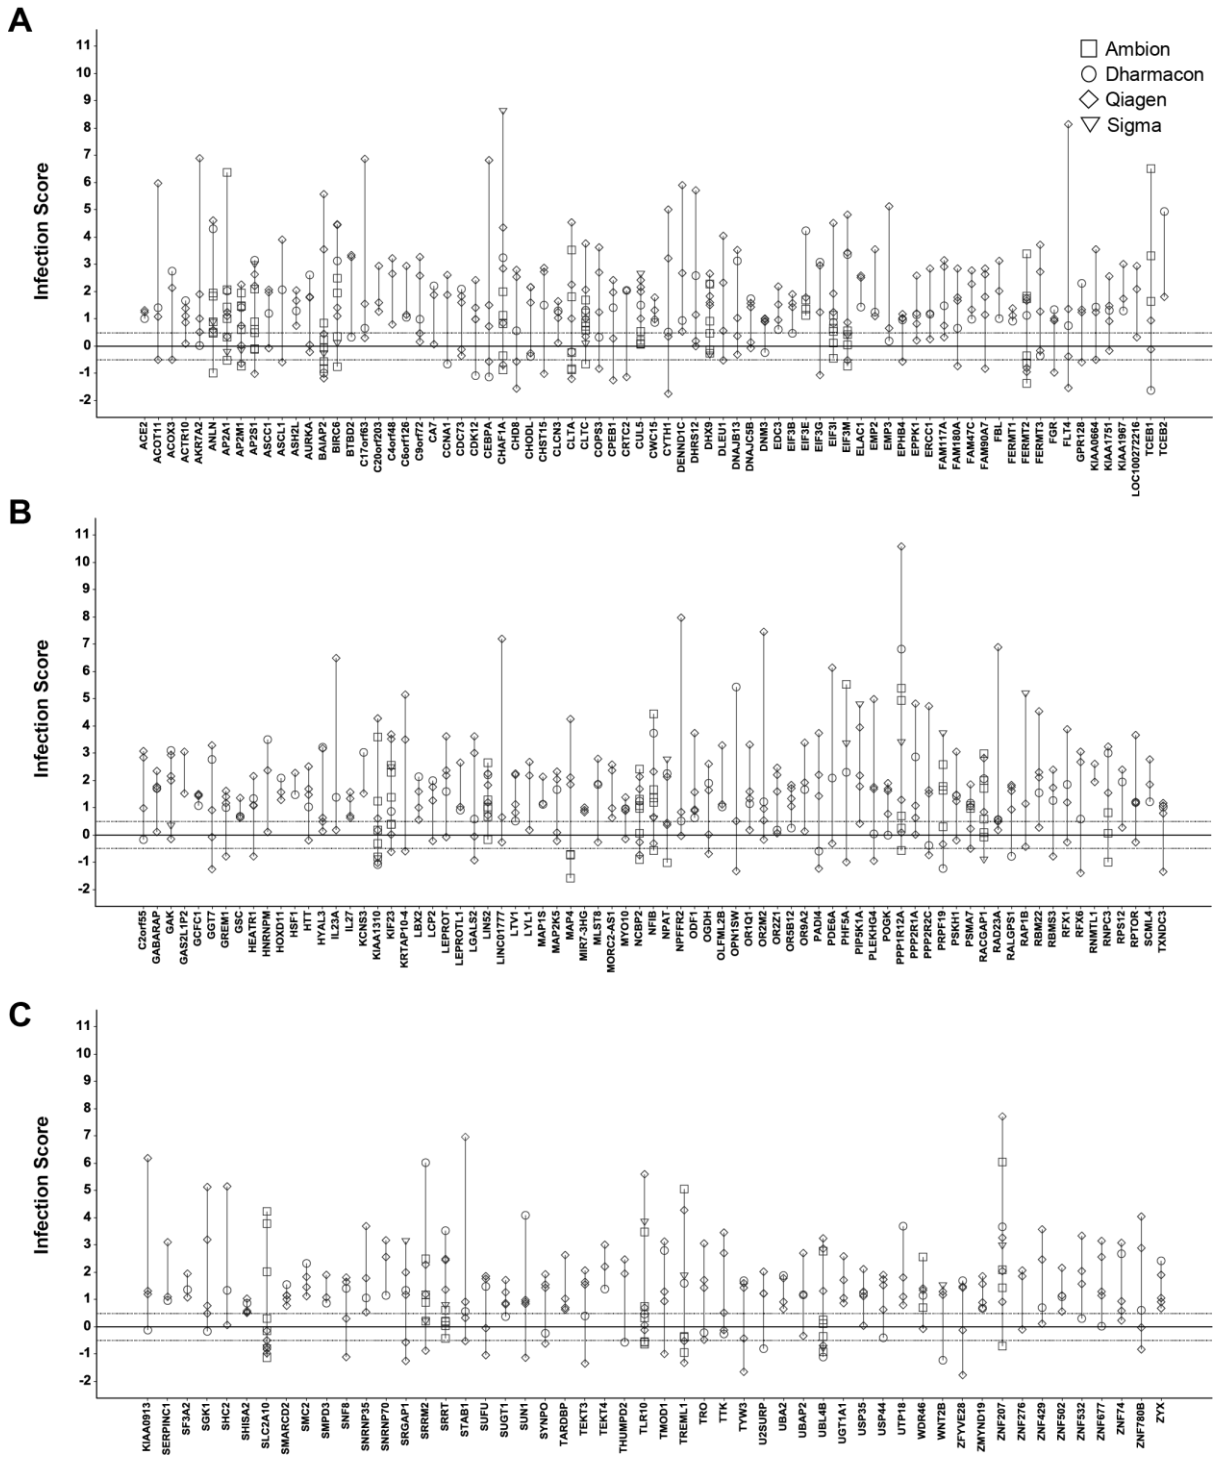

939

940 **Fig. S3 Data from single RNAi reagents for the selected 203 up-hits. (A-C) Averaged**  
 941 **infection score (z-scored) and associated standard deviation for each of the 203 up-hits (RSA**  
 942 **analysis). Displayed are the results of each tested RNAi reagents (siRNA or esiRNA), averaged**



943 by biological replicate. RNAi providers are differentiated by the shape used to indicate the data  
944 point.

945 **Supporting Table S1 (SupportingTableS1-2.xls)**

946 List of the 223 down-hits from the genome-wide siRNA screen (RSA analysis) with associated  
947 p-value and infection score (cut-off: RSA p-value <0.01, S1\_Table.xlsx).

948 **Supporting Table S2 (SupportingTableS1-2.xls)**

949 List of the 202 up-hits from the genome-wide siRNA screen (RSA analysis) with associated p-  
950 value and infection score (cut-off: RSA p-value <0.01, S2\_Table.xlsx).

951 **Supporting Table S3 (SupportingTableS3.xls)**

952 Aggregated image analysis data used for Figure 3, with associated infection scores for both  
953 entry and endpoint assays. Single data points and averaged data per siRNA and per genes (as  
954 displayed in Fig. 3B) are indicated (S3\_Table.xlsx).

955 **Supporting Table S4**

| siRNA      | VPS35 |        | VPS29 |        | VPS26 |        |
|------------|-------|--------|-------|--------|-------|--------|
|            | AVG   | SD     | AVG   | SD     | AVG   | SD     |
| siVPS35    | 21.5  | ± 2.4  | 25.8  | ± 11.5 | 25.1  | ± 6.2  |
| siVPS29    | 105.8 | ± 10.4 | 6.6   | ± 5.3  | 90.2  | ± 36.8 |
| siVPS26A   | 65.5  | ± 13.9 | 21.1  | ± 21.5 | 10.6  | ± 2.9  |
| siVPS26A/B | 49.5  | ± 12.9 | 23.7  | ± 31.3 | 5.5   | ± 3.3  |

956

957 Intensity quantification from Western blot analysis of siRNA-treated HeLa cells. Presented are  
958 the averaged normalized intensities and associated standard deviation (n=3) for each VPS  
959 retromer protein upon knockdown of the indicated gene. Normalized intensities correspond to  
960 the intensity of the designated proteins divided by the intensity of the tubulin signal obtained  
961 for the same sample, on the same blot.
